1 **Tracing foot-and-mouth disease virus phylogeographical patterns and transmission**  
2 **dynamics.**

3 **Running title:** Phylogeography of foot-and-mouth disease virus

4

5 Manuel Jara<sup>1</sup>, Alba Frias-De-Diego<sup>1</sup>, Simon Dellicour<sup>2,3</sup>, Guy Baele<sup>3</sup>, and Gustavo Machado<sup>1,\*</sup>

6

7 <sup>1</sup>Department of Population Health and Pathobiology, College of Veterinary Medicine, North  
8 Carolina State University, Raleigh, NC, USA

9 <sup>2</sup>Spatial Epidemiology Lab (SpELL), Université Libre de Bruxelles, CP160/12 50, av. FD

10 Roosevelt, 1050 Bruxelles, Belgium

11 <sup>3</sup>Department of Microbiology, Immunology and Transplantation, Laboratory for Clinical and  
12 Epidemiological Virology, Rega Institute, KU Leuven, Herestraat 49, 3000 Leuven, Belgium

13

14 \*Corresponding author: gmachad@ncsu.edu

15

16 **Abstract**

17 Foot-and-mouth disease virus (FMDV) has proven its potential to propagate across local and  
18 international borders on numerous occasions, but yet details about the directionality of the  
19 spread along with the role of the different host in transmission remain unexplored. To elucidate  
20 FMDV global spread characteristics, we studied the spatiotemporal phylodynamics of serotypes  
21 O, A, Asia1, SAT1, SAT2, and SAT3, based on more than 50 years of phylogenetic and  
22 epidemiological information. Our results revealed phylogeographic patterns, dispersal rates, and  
23 the role of host species in the dispersal and maintenance of virus circulation. Contrary to  
24 previous studies, our results showed that three serotypes were monophyletic (O, A, and Asia1),  
25 while all SATs serotypes did not evidence a defined common ancestor. Root state posterior  
26 probability (RSPP) analysis suggested Belgium as the country of origin for serotype O (RSPP=

27 0.27). India was the ancestral country for serotypes A (RSPP= 0.28), and Asia-1 (RSPP= 0.34),  
28 while Uganda appeared as the most likely origin country of all SAT serotypes (RSPP> 0.45).  
29 Furthermore, we identified the key centers of dispersal of the virus, being China, India and  
30 Uganda the most important ones. Bayes factor analysis revealed cattle as the major source of  
31 the virus for most of the serotypes (RSPP> 0.63), where the most important host-species  
32 transition route for serotypes O, A, and Asia1 was from cattle *Bos taurus* to swine *Sus scrofa*  
33 *domesticus* (BF>500), while, for SAT serotypes was from *B. taurus* to African buffalo *Syncerus*  
34 *caffer*. This study provides significant insights into the spatiotemporal dynamics of the global  
35 circulation of FMDV serotypes, by characterizing the viral routes of spread at serotype level,  
36 especially uncovering the importance of host species for each serotype in the evolution and  
37 spread of FMDV which further improve future decisions for more efficient control and  
38 eradication.

39

40 **Keywords:** molecular epidemiology, transboundary emerging diseases, virus dispersal.

41

## 42 INTRODUCTION

43 The rapid growth of global population along with the current demand for animal protein and the  
44 increasing animal trade have increased the spread of a broad range of transboundary animal  
45 diseases (TADs) [1, 2]. Clear examples of this phenomenon are the recent emergence of  
46 African Swine Fever in Asia, Avian Influenza or Contagious Bovine Pleuropneumonia and the  
47 return of Foot-and-mouth disease virus (FMDV) to Korea and other countries which successfully  
48 eliminated the virus for several years [3–7]. Understanding the tempo and mode of disease  
49 evolution allows to estimate the impact of external factors influencing these diseases and  
50 assess the evolutionary patterns followed over time, which can be better studied by considering  
51 the most recent advances in virus sequencing and phylogenetics [8–10].

52 Molecular phylogenetics has shown to be an accurate and highly impacting approach in  
53 the understanding of the spatiotemporal dynamics of infectious diseases, with the capacity to  
54 explain disease spread, virulence and invasion potential [11–20]. In the case of TADs,  
55 molecular phylogenetics has also proven to be a useful approach, providing accurate  
56 knowledge for the control of pathogens worldwide [21–24], however, it remains underused.

57 FMDV causes the most influential transboundary animal disease with historical  
58 worldwide circulation reported in domestic and wildlife reservoirs [25, 26]. FMD is a highly  
59 contagious disease caused by a small single-stranded RNA virus of the genus *Aphthovirus*,  
60 member of the family Picornaviridae [27] and classified into seven different serotypes; O, A, C,  
61 Asia1 and Southern African Territories (SATs) 1, 2 and 3 [25, 28–30] which severely affect the  
62 productivity of domesticated livestock, causing great economic losses [31–33]. The United  
63 States Department of Agriculture has estimated that the introduction of FMDV could result in  
64 losses between \$15 to \$100 billion [34–37]. One of the main reasons for this great impact is the  
65 wide variety of hosts known for FMDV (i.e., cattle, buffalo, swine, sheep, and deer), altogether it  
66 affects more than 70 species of cloven-hoofed animals [38]. FMDV is known to be transmitted  
67 locally and globally, often associated with infected animal products and human and animal  
68 movements [39, 40]. Transmission is also facilitated by airborne spread, direct animal contact  
69 with infected individuals or carcasses and translocation of contaminated staff, equipment, and  
70 machinery [41, 42].

71 Individual genes have been widely used to study the phylogenetic relationships among  
72 FMD serotypes [43–50], however, little has been done using whole genome sequences (WGS)  
73 [26, 51–53]. Nevertheless, these studies have been often based on a limited number of  
74 sequences (<200), or on phylogenetic methods that do not have the ability to accommodate  
75 uncertainty (i.e., Bayesian phylodynamic methods) [54]. Although these methods have been  
76 widely used, they present certain degree of evolutionary inaccuracy since in most cases  
77 (excluding Yoon et al (2011) and Omondi et al (2019)) the Bayesian phylogenetic and

78 phylodynamic methods were not considered. Thus, their inherent ability to accommodate  
79 uncertainty, and therefore to assess the level of error of the predictions obtained, was often  
80 neglected.

81 Several studies have explored the spatiotemporal evolutionary dynamics of FMDV in  
82 different parts of the world, mainly focusing on the diffusion patterns across its endemic regions:  
83 Asia and Africa [31, 48, 55–59] However, studies considering all serotypes are only available  
84 within small geographic regions, and global studies only assessed some of the viral serotypes  
85 [56, 60].

86 In this study, we investigated the spatiotemporal dynamics of FMDV by using Bayesian  
87 phylodynamic analyses of comprehensive genetic, geographical and temporal data regarding  
88 past FMDV occurrences. The objectives of this work were to reconstruct the global evolutionary  
89 epidemiology of FMDV serotypes O, A, Asia1, and SATs, to make comparisons among the  
90 global spatiotemporal spread of each FMDV serotype, identify ancestral countries and provide  
91 inferences about the evolutionary patterns and the transmission between host species.

92

## 93 **MATERIALS AND METHODS**

### 94 **Data collection and curation**

95 We built a comprehensive genetic database comprising 249 publicly available whole genome  
96 sequences from six FMDV serotypes (A, O, Asia1, SAT 1, SAT 2 and SAT 3), with collection  
97 dates ranging from 1959 to 2017 (GenBank ID numbers in Supplementary material Table S1).  
98 Serotype C was not included in this study due to data unavailability (only 3 sequences were  
99 available). Our dataset gathers information from 43 countries and 4 continents obtained from  
100 the Virus Pathogen Resource database, available at <https://www.viprbrc.org> (See Table S1). To  
101 determine accurate phylogenetic relationships among FMDV reports, we combined the available  
102 genetic information along with collection date, host species (i.e., *Bos taurus*= cattle, *Syncerus*  
103 *caffer*= African buffalo, *Bubalus bubalis*= Water buffalo, *Sus scrofa domesticus*= swine, *Sus*

104 *scrofa*= boar, and *Ovis aries*= sheep) and location (discrete information at country level) as  
105 metadata information. Any sample lacking one of these three characteristics was discarded.

106

### 107 **Discrete phylogeographical analysis**

108 Sequences were aligned using Mega X, available at [www.megasoftware.net](http://www.megasoftware.net) [61]. The  
109 recombination detection program (RDP) v5.3 was used to search for evidence of recombination  
110 within our dataset [62]. Each serotype was screened using five different methods (BootScan,  
111 Chimaera, MaxChi, RDP, and SiScan). After removing all the duplicated sequences (i.e.,  
112 representing the same outbreak), no evidence of recombinant sequences was observed in any  
113 FMDV serotypes analyzed. To determine whether there was a sufficient temporal molecular  
114 evolutionary signal of the FMDV sequences used for each serotype phylogeny, we used  
115 TempEst v1.5 [63]. To calculate the *P*-values associated with the phylogenetic signal analysis,  
116 we used the approach described by [64] based on 1,000 random permutations of the sequence  
117 sampling dates [65]. The relationship found between root-to-tip divergence and sampling dates  
118 (years) supported the use of molecular clock analysis in this study for all serotypes. Root-to-tip  
119 regression results for each serotype are reported in Supplementary Table S2, all the results  
120 supported a significant temporal signal (*P*-value<0.05). Phylogeographic history of FMDV  
121 dispersal was recovered from the obtained spatiotemporal phylogenies for each serotype.  
122 Phylogenetic trees were generated by a discrete phylogeography estimation by Bayesian  
123 inference through Markov chain Monte Carlo (MCMC), implemented in BEAST v2.5.0 [66]. We  
124 partitioned the coding genes into first+second and third codon positions and applied a separate  
125 Hasegawa-Kishino-Yano (HKY+G; [67]) substitution model with gamma-distributed rate  
126 heterogeneity among sites to each partition [68].

127 By using Nested Sampling Beast package v1.0.4 [69] we compared different molecular  
128 clock models to find the one that showed the best fit for the data related to each serotype. The  
129 marginal likelihood value supported the use of uncorrelated lognormal relaxed molecular clock

130 [70]. To infer the epidemic demographic histories of FMDV per each serotype we estimated the  
131 effective number of infections through time by using the Bayesian skyline plot approach [71]. All  
132 analyses were developed for 200 million generations, sampling every 10,000<sup>th</sup> generation and  
133 removing 10% as chain burn-in. All the Markov chain Monte Carlo analyses for each serotype  
134 were investigated using Tracer software v1.7 [72] to ensure adequate effective sample sizes  
135 (ESS) (above 200), which were obtained for all parameters. Final trees were summarized and  
136 visualized via Tree Annotator v. 2.3.0 and FigTree 1.4.3 respectively (included in BEAST v2.5.0)  
137 [66, 73].

138 To reconstruct the ancestral-state phylogeographic transmission across countries and  
139 hosts, we used the discrete-trait extension implemented in BEASTv2.5.0 [66]. In addition, to  
140 explore the most important historical dispersal routes for the spread FMDV across countries, as  
141 well as most probable host-species transition, we used a Bayesian stochastic search variable  
142 selection (BSSVS) [74]. Using BSSVS approach, we identified and eliminated the nonzero rates  
143 of change between each pair of discrete traits (countries and hosts species) based on its Bayes  
144 factor value obtained (lower than 3). To perform this analysis, a symmetric rate matrix was  
145 assumed. To infer the intensity of directional transitions (forward and backward) within a matrix  
146 of the discrete traits mentioned above, we used a Markov jumps approach. To interpret the  
147 Bayes factors, a value of  $<3$ , as mentioned above, is not significant (hardly worth mentioning),  
148  $BF= 3.1-20$  represents positive support,  $BF= 20.1-150$  represents strong support, while  $>150.1$   
149 represents an overwhelming support [75].

150 Finally, we visualized the spatiotemporal viral diffusion of each serotype by using Spatial  
151 Phylogenetic Reconstruction of Evolutionary Dynamics using Data-Driven Documents (D3)  
152 SPREAD3 software [76] considering the whole transmission and also the most significant  
153 connections between localities following the Bayesian stochastic search variable selection  
154 (BSSVS) method, with each country used as a discrete variable with a cutoff  $BF > 3$  [75]. In  
155 addition, we classified the viral spread of each serotype in two categories: local, if the

156 transmission occurs through neighboring countries, and long distance, if the dispersion jumps  
157 beyond adjacent neighboring countries.

158

## 159 **RESULTS**

160 The number of available sequences per country varied from 1 to 18 whole genome sequences  
161 (WGS). Our results showed that India, China, Uganda, Argentina, and Zimbabwe were the  
162 countries with the highest number of available genomes (Supplementary Table S3). Likewise,  
163 several countries have been historically affected by more than one serotype, particularly in  
164 Africa and Asia, where we observed that Uganda presented the highest virus diversity as it has  
165 been subjected to the spread of serotypes O, and all SATs (Supplementary Table S3,  
166 Supplementary Fig. S1).

167

### 168 **Spatiotemporal dynamics of FMDV**

169 Phylogeographic analyses highlighted great asymmetries in the tempo and mode of each  
170 serotype evolution (Fig. 1). SAT1 appeared to be the basal clade of the entire lineage,  
171 originating SAT2, SAT3 and serotype A, which later diversified into serotype Asia1, and O. Our  
172 analysis suggested O as the most recent, prolific and widespread lineage, with the highest  
173 number of sequences available worldwide. Serotype A and Asia1 appeared second and third in  
174 the number of available sequences, followed by all SAT serotypes. Maximum clade credibility  
175 phylogeny showed the monophyly of serotypes O, A, and Asia1 (each serotype shared a  
176 common ancestor), while SAT serotypes appeared to have multiple origins (Fig. 1).

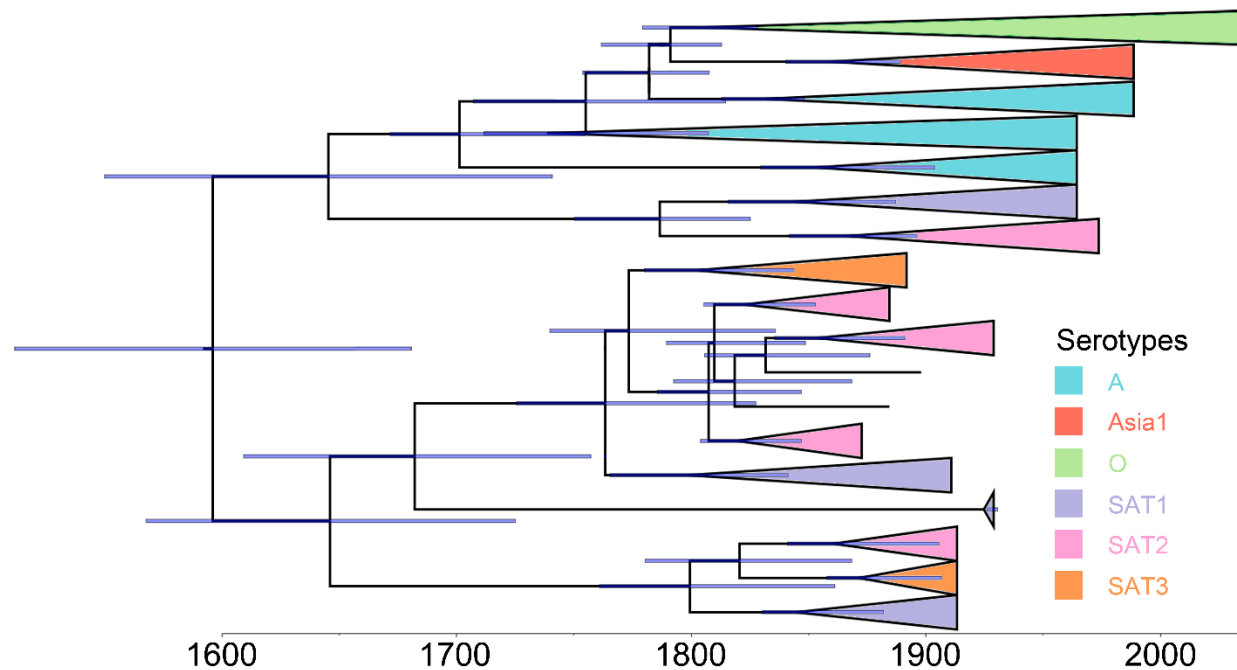

177

178 **Fig. 1** Condensed phylogenetic tree showing the overall evolutionary history of FMDV  
179 representing the relationships between all serotypes. The tree is based on a maximum clade  
180 credibility phylogeny inferred from 249 whole genome sequences. Branch bars represent  
181 posterior probabilities of branching events ( $P > 0.95$ ).

182

### 183 **Spatiotemporal diffusion among serotypes**

184 We investigated and compared the historical spreads of FMDV at serotype level, from the ones  
185 with local distribution (Asia1 and SATs) to the serotypes with widespread dispersal (O and A)  
186 (Sobrinho et al., 2001; Fèvre et al., 2006; Di Nardo et al., 2011; Jamal and Belsham, 2013;  
187 Knight-Jones and Rushton, 2013; Brito et al., 2017).

188

### 189 **Serotype O**

190 We analyzed 97 WGS from serotype O, which comprises 39% of the global FMDV tree (Fig. 1).  
191 This serotype also presents the widest distribution of all serotypes, with records from 42  
192 countries (Fig. 2). Based on our phylogeographic analysis, the most likely center of origin for



193 this serotype was Belgium (root state posterior probability [RSPP] = 0.27) from which it spread  
194 globally across long distances to several countries through Europe, Asia, Africa and South  
195 America. A remarkable aspect of this global spread is that most of it has occurred in less than  
196 50 years (Fig. 3A) (see Supplementary Video S1 for detailed footage). These patterns have also  
197 appeared in our spatiotemporal diffusion map, which shows that the global distribution of this  
198 serotype is highly represented by long-range movements across countries and continents (Fig.  
199 3A). Phylogenetic reconstruction identified clusters formed by different sub-lineages, where the  
200 most representative centers of dispersal events (geographic spread accompanied by  
201 diversification) for this serotype were Poland and the United Kingdom in Europe, China, Japan,  
202 and Indonesia in Asia, Egypt in Africa and Argentina in South America. Likewise, we observed  
203 that China, South Korea, and Turkey were also among the countries with the highest number of  
204 sequences (see Fig. 1A). In addition, BSSVS-BF results showed the most significant viral  
205 transmission routes for serotype O, where the most intense were represented from Turkey to  
206 Egypt, from Egypt to Indonesia and from Myanmar to Japan ( $BF > 1038.7$ ) (Fig. 3B).

207 Serotype O also showed the highest host diversity among all FMDV serotypes, which is  
208 represented by cattle (*Bos taurus*), swine (*Sus scrofa domesticus*), boar (*Sus scrofa*), sheep  
209 (*Ovis aries*), and the water buffalo (*Bubalus bubalis*), where the most representative were *B.*  
210 *taurus* (71% of the sequences) and *S. scrofa domesticus* (20%). *B. taurus* was not only the  
211 most important host for this serotype but also the most likely initial host of the ancestral lineages  
212 (RSPP= 0.95), followed by *S. scrofa domesticus* (RSPP= 0.03) and *O. aries* (RSPP= 0.032)  
213 respectively (Fig. 2). Bayes factor analysis showed that the most significant transmission routes  
214 occurred from *B. taurus* to *S. scrofa domesticus* ( $BF = 635.3$ ), followed by from *B. taurus* to *O.*  
215 *aries* ( $BF = 73.6$ ), and in a minor scale, from *S. scrofa domesticus* to *B. taurus* ( $BF = 9.7$ ), as well  
216 as from *B. taurus* to *B. bubalis* ( $BF = 9.1$ ) (Fig. 3C).

217 The Bayesian skyline plot (BSP) was used to describe the observed changes in genetic  
218 diversity (population size) through time, showing a steady pattern in this serotype, with a sharp

219 decrease in its effective population size occurred ~2000, which returned to previous rates years  
220 later (Fig. S2).

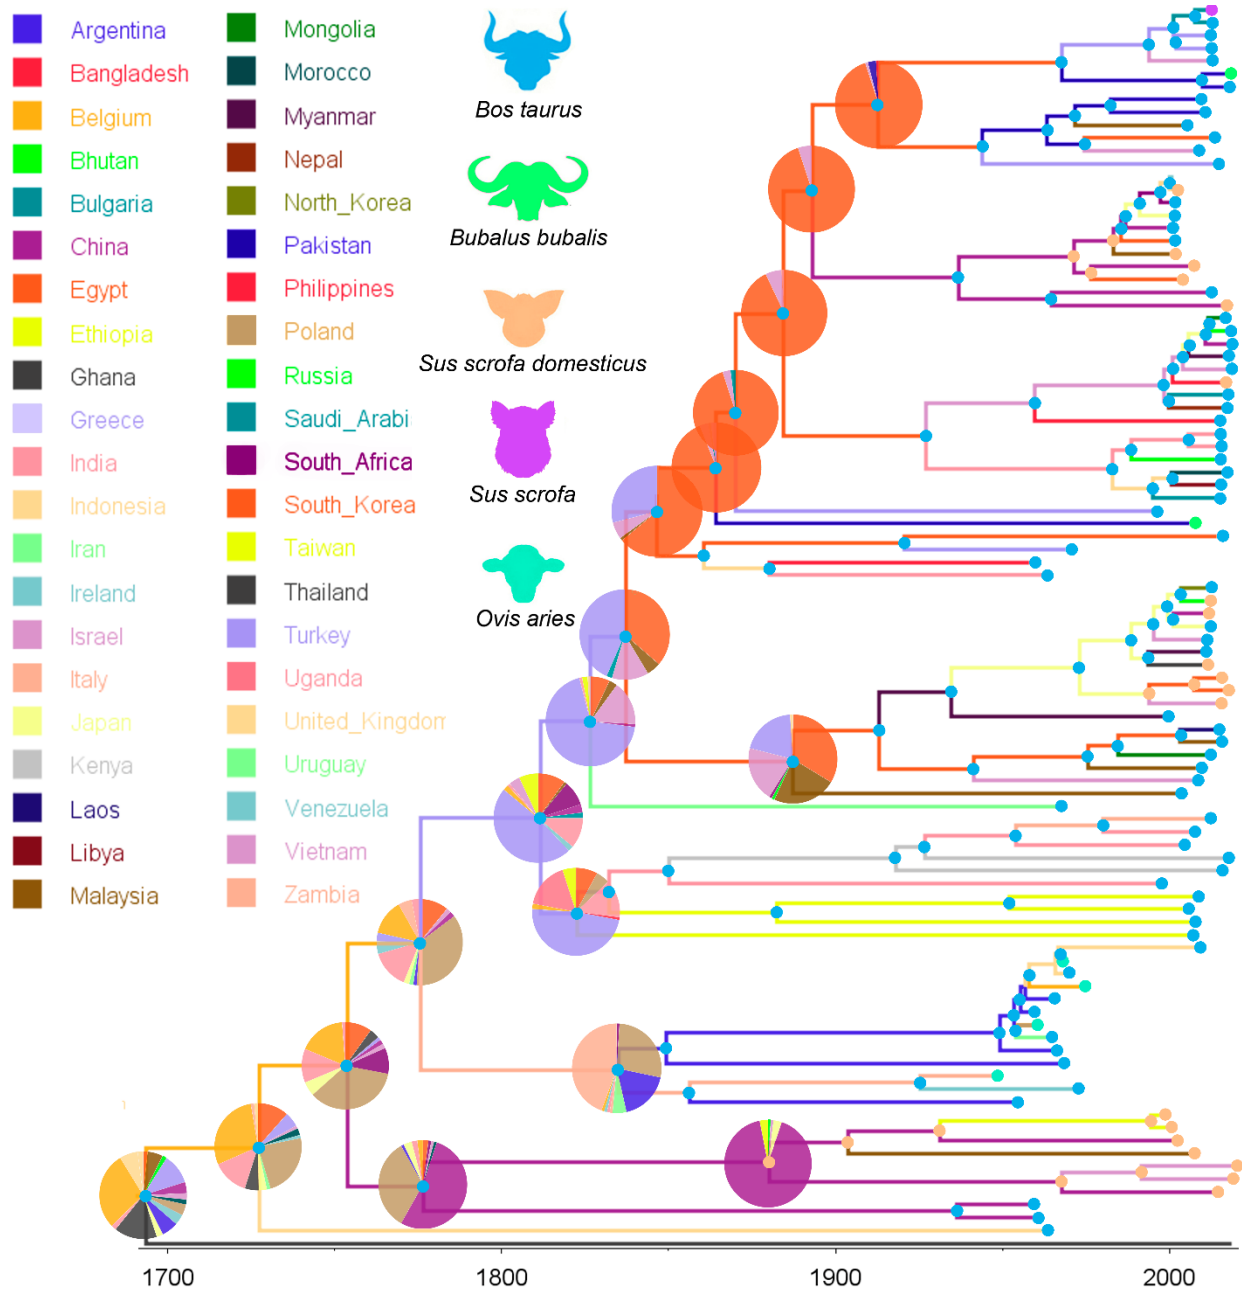

221  
222 **Fig. 2** Dispersal history of FMDV lineages of Serotype O, as inferred by discrete  
223 phylogeographic analysis. Maximum clade credibility phylogeny colored according to the  
224 countries of origin. Branch bars represent posterior probabilities of branching events ( $P > 0.95$ ).  
225 Colored dots at the end of the branches represent the host species (*Bos taurus*= cattle, *Sus*

226 *scrofa domesticus*= swine, *Ovis aries*= sheep, *Bubalus bubalis*= water buffalo, and *Sus scrofa*=  
 227 *boar*). The probabilities of ancestral states (inferred from the Bayesian discrete trait analysis)  
 228 are shown in pie charts at each node, while circles on each branch and tips represent the most  
 229 likely hosts.

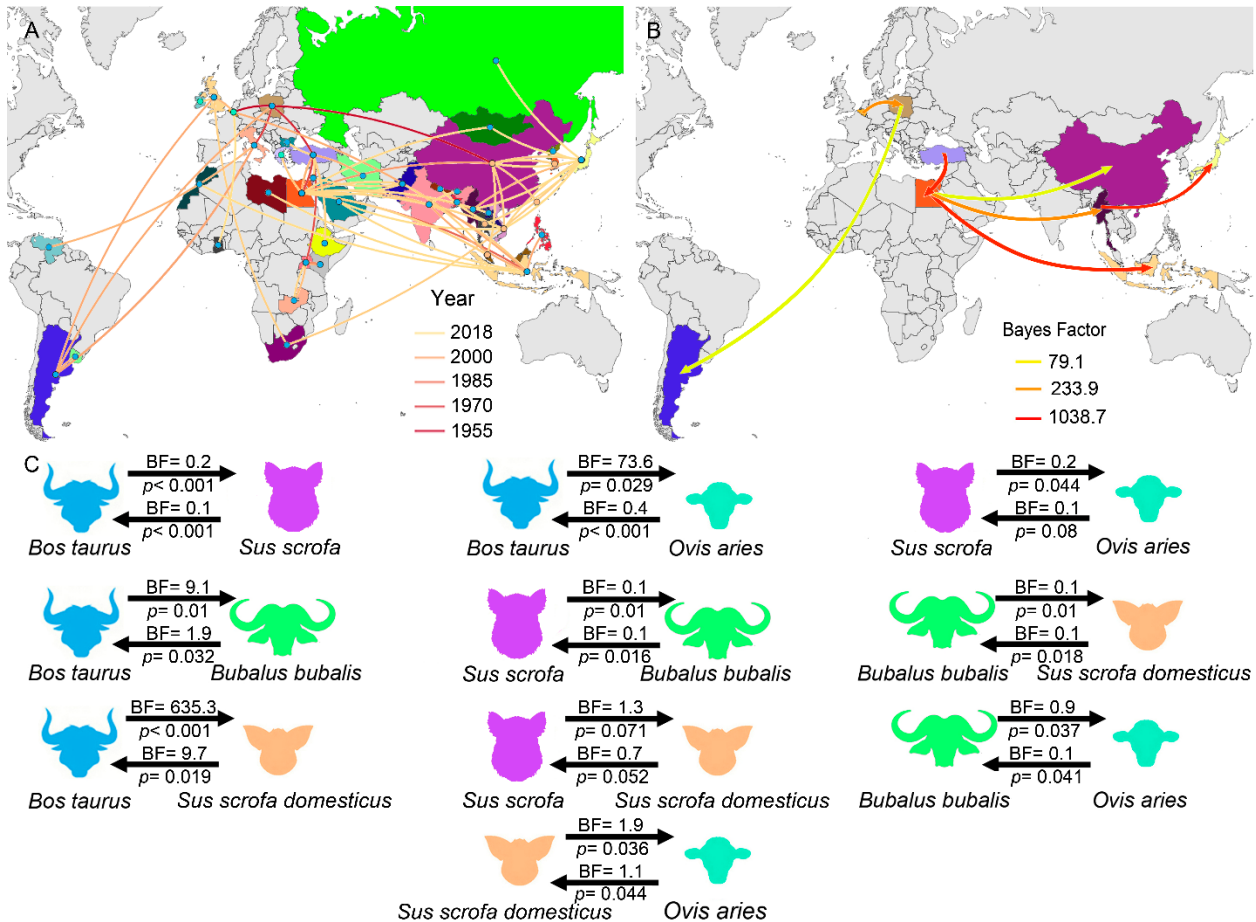

230  
 231 **Fig. 3** (A) Reconstructed spatiotemporal diffusion of FMDV serotype O spread, the color of the  
 232 branches represents the age of the internal nodes, where darker red colors represent older  
 233 spread events. (B) Representation of the most significant location transitions events for FMDV  
 234 serotype O spread based on only the rates supported by a BF greater than 3 are indicated,  
 235 where the color of the branches represent the relative strength by which the rates are  
 236 supported. (C) Transmission rates between hosts (*Bos taurus*= cattle, *Sus scrofa domesticus*=  
 237 swine, *Ovis aries*= sheep, *Bubalus bubalis*= water buffalo, and *Sus scrofa*= boar). based on

238 BSSVS-BF values are represented on the top of the black arrows, while the root state posterior  
239 probability for the host-species transition are given on its bottom.

240

#### 241 **Serotype A**

242 Phylogeographic relationships obtained for serotype A indicated India as its most likely center of  
243 origin (RSPP= 0.28, Fig. 4). Besides, several centers of diversification have been identified for  
244 this serotype, where the most important have been India and Malaysia in Asia, Netherlands and  
245 Germany in Europe, Chad in Africa and Brazil in South America (Fig. 4). Our phylogeographic  
246 analysis also highlighted the importance of Brazil as a center of origin for a wide variety of  
247 European and South American lineages (Fig. 4). As in serotype O, we observed that long-  
248 distance dispersal events were the most representative of the spatiotemporal dynamics of this  
249 serotype, evidencing a global distribution, with records from 33 countries (Fig. 5B), which  
250 represents 33% of the total FMDV sequences.

251 BSSVS-BF analysis evidenced that the most significant transmission routes for this  
252 serotype come from India. Bayesian Factor analysis describing the most important viral  
253 transmission routes highlighted the importance of India in different directions, mainly to  
254 Netherlands (BF= 173.2), to Chad (BF= 162.9), and to Malaysia (BF= 28.3). Likewise, some  
255 European, such as Germany appeared to be important for the spread of this serotype into South  
256 America (BF=81.6, Fig. 5B).

257 The host species that showed highest number of serotype A sequences comes from *B.*  
258 *taurus* (82%), followed by *O. aries* (10%), *S. scrofa domesticus* (6%), and *B. bubalis* (2%)  
259 (Supplementary Table S1). Thus, the most important host behind the origin of the analyzed  
260 sequences of serotype A was *B. taurus* (RSPP= 0.98, Fig. 4). Furthermore, Bayes factor  
261 analysis indicated that the most significant transmission routes for the spread of this serotype  
262 occurred from *B. taurus* to all the other host. In order of significance, we can observe: to *S.*  
263 *scrofa domesticus* (BF= 1256.8), to *B. bubalis* (BF= 628.5), and to *O. aries* (BF= 74.1, Fig. 5C).

264 The BSP for this serotype showed a constant lineage diversity with a slight increase in  
265 1980. The biggest variations between the years 2000 -2017, showed a sharp decrease followed  
266 by a rapid increase in lineage diversity that was maintained until 2010 when these values mostly  
267 returned to the original values (Fig. S2).

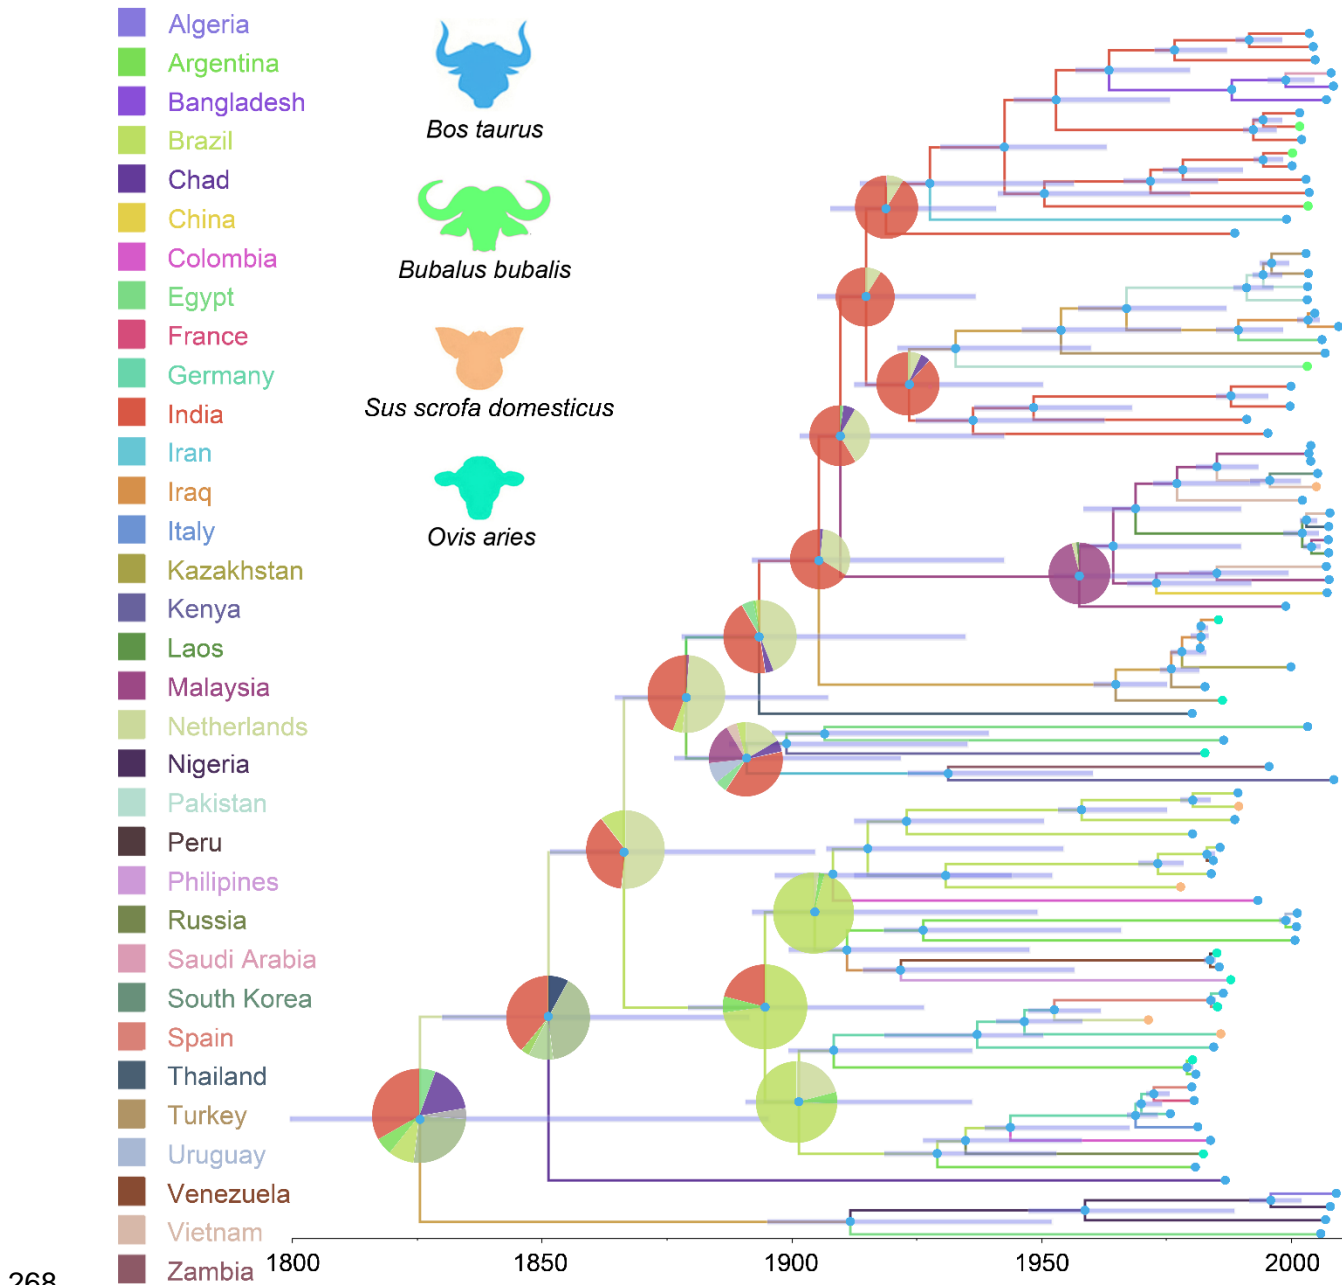

269 **Fig. 4** Dispersal history of FMDV lineages of Serotype A, as inferred by discrete  
270 phylogeographic analysis. Maximum clade credibility phylogeny colored according to the

271 countries of origin. Branch bars represent posterior probabilities of branching events ( $P > 0.95$ ).  
 272 Colored dots at the end of the branches represent the host species (*Bos taurus*= cattle, *Sus*  
 273 *scrofa domesticus*= swine, *Ovis aries*= sheep, and *Bubalus bubalis*= water buffalo. The  
 274 probabilities of ancestral states (inferred from the Bayesian discrete trait analysis) are shown in  
 275 pie charts at each node, while circles on each branch and tips represent the most likely hosts.  
 276

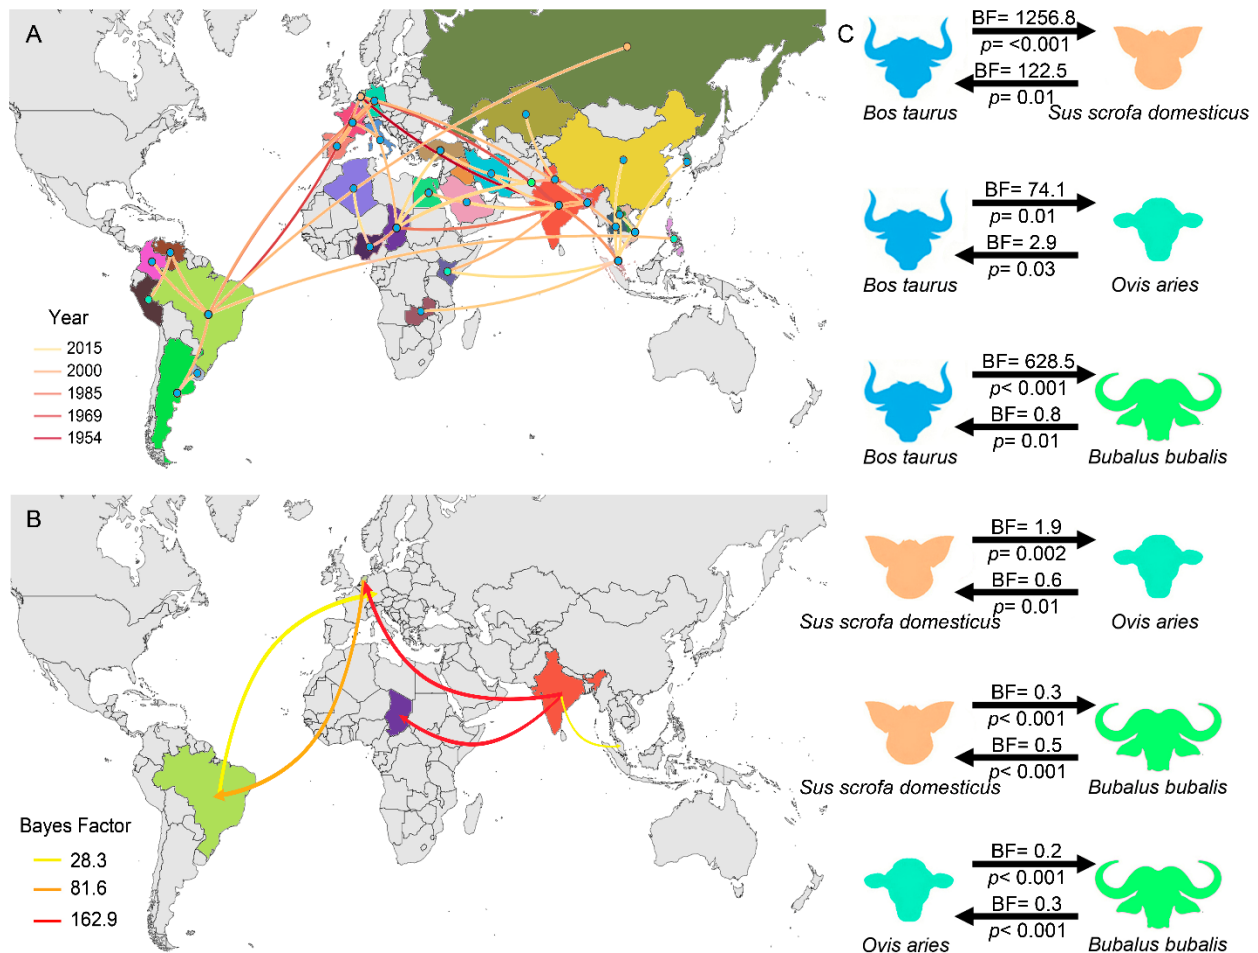

277  
 278 **Fig. 5** (A) Reconstructed spatiotemporal diffusion of FMDV serotype A spread, the color of the  
 279 branches represents the age of the internal nodes, where darker red colors represent older  
 280 spread events. (B) Representation of the most significant location transitions events for FMDV  
 281 serotype A spread based on only the rates supported by a BF greater than 3 are indicated,  
 282 where the color of the branches represent the relative strength by which the rates are

283 supported. (C) Transmission rates between hosts (*Bos taurus*= cattle, *Sus scrofa domesticus*=  
284 swine, *Ovis aries*= sheep, and *Bubalus bubalis*= water buffalo) based on BSSVS-BF values are  
285 represented on the top of the black arrows, while the root state posterior probability for the host-  
286 species transition are given on its bottom.

287

### 288 **Serotype Asia1**

289 This serotypes represented 12% of the entire FMDV sequences. Similarly to serotype A,  
290 phylogeographic analyses indicated India as the most likely origin of this serotype (RSPP=  
291 0.34), from which it diverged in all directions (Fig. 6, Supplementary Video S3). The  
292 phylogenetic relationships seen in this serotype show a clear disparity between the lineages  
293 found in countries from western Asia (i.e., Israel, Lebanon, Afghanistan, and Turkey) and  
294 eastern Asia (i.e., China, Mongolia, Malaysia, and Vietnam) (Fig. 7A). Phylodynamic analysis  
295 shows that the most important centers of diversification for this serotype are India, China,  
296 Pakistan and Vietnam (Fig. 7A). BSSVS-BF analysis showed similar results as the observed in  
297 serotype A, where the most significant transmission routes are related to India. In order of  
298 intensity, the most important routes are the ones from India to China (BF= 182.8) and from India  
299 to Vietnam (BF= 61.5) (Fig. 7B).

300 In relation to the number of available sequences, the most representative hosts for this  
301 serotype were *B. taurus* (66% of the sequences), followed by *S. scrofa* (14%, exclusively in  
302 China), *Bubalus bubalis* (6%, observed in India, Vietnam, and China) and *Ovis aries* (~3%,  
303 observed only in China). Phylogenetic analysis showed that the hosts responsible for the spread  
304 of this serotype were *B. taurus* (RSPP= 0.98), followed by *S. scrofa* (RSPP= 0.2). In addition,  
305 Bayes factor analysis indicated that the most strongly supported transmission routes for the  
306 spread of this serotype occurred from *B. taurus* to *B. bubalis* (BF= 1405.6), followed by from *B.*  
307 *taurus* to *S. scrofa* (BF= 401.3), and from *B. taurus* to *O. aries* (BF= 134.1) (Fig. 7C).

308           Phylogenetic patterns of serotype Asia1 spread through BSP approach showed a  
309 constant lineage diversity over time, with a very slight variation around the year 2000 (Fig. S2).  
310

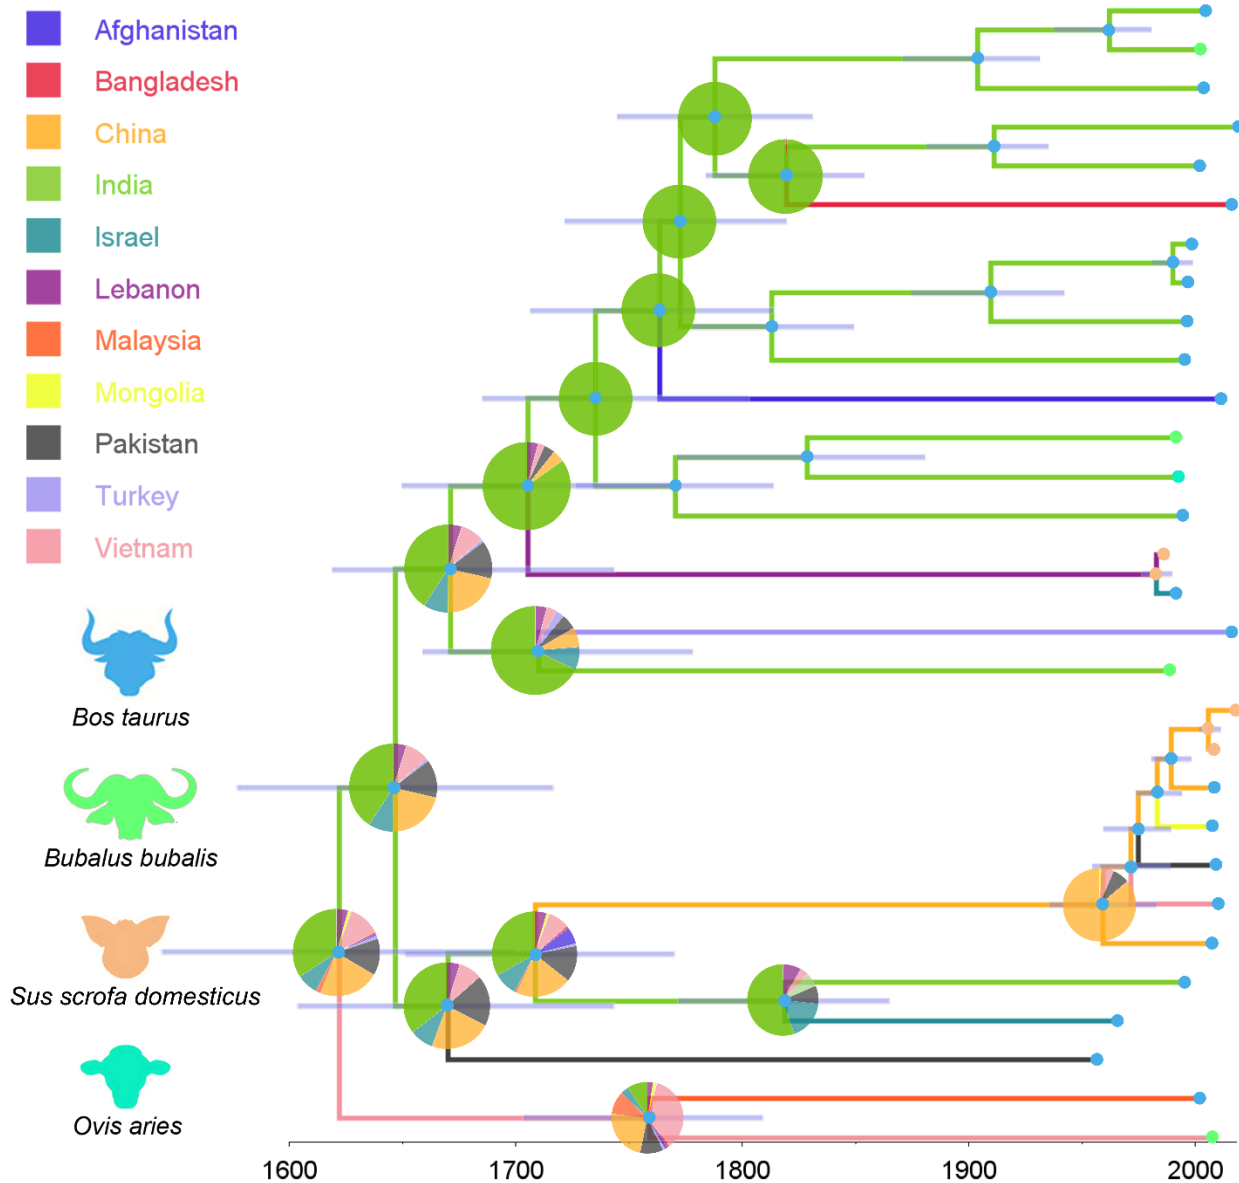

311  
312 **Fig. 6** Dispersal history of FMDV lineages of Serotype Asia1, as inferred by discrete  
313 phylogeographic analysis. Maximum clade credibility phylogeny colored according to the  
314 countries of origin. Branch bars represent posterior probabilities of branching events ( $P > 0.95$ ).  
315 Colored dots at the end of the branches represent the host species (*Bos taurus*= cattle, *Sus*



316 *scrofa domestica*= swine, *Ovis aries*= sheep, and *Bubalus bubalis*= water buffalo. The  
 317 probabilities of ancestral states (inferred from the Bayesian discrete trait analysis) are shown in  
 318 pie charts at each node, while circles on each branch and tips represent the most likely hosts.  
 319

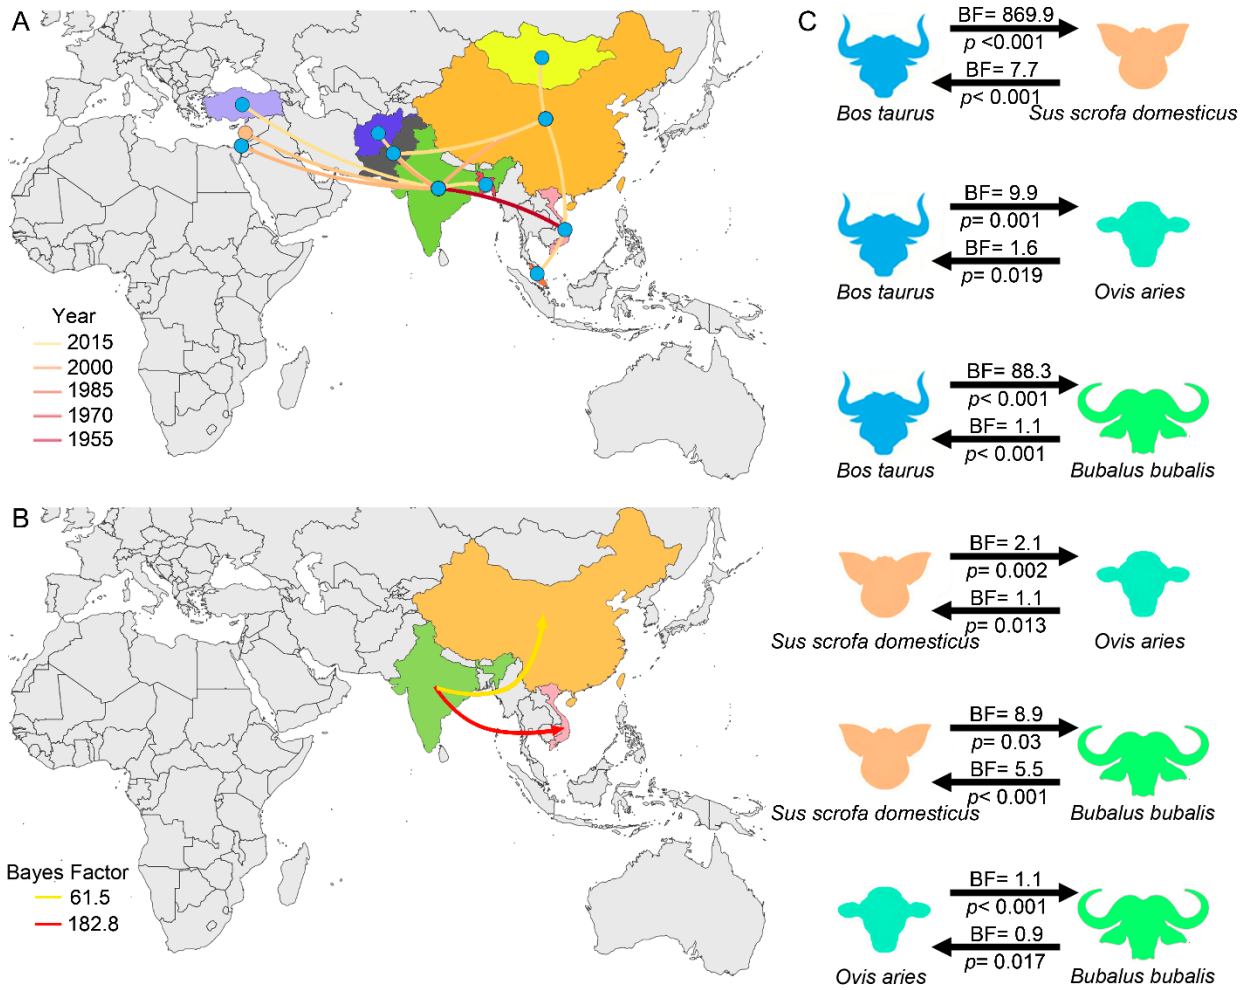

320  
 321 **Fig. 7** (A) Reconstructed spatiotemporal diffusion of FMDV serotype Asia1 spread, the color of  
 322 the branches represents the age of the internal nodes, where darker red colors represent older  
 323 spread events. (B) Representation of the most significant location transitions events for FMDV  
 324 serotype Asia1 spread based on only the rates supported by a BF greater than 3 are indicated,  
 325 where the color of the branches represent the relative strength by which the rates are  
 326 supported. (C) Transmission rates between hosts (*Bos taurus*= cattle, *Sus scrofa domestica*=

327 swine, *Ovis aries*= sheep, and *Bubalus bubalis*= water buffalo) based on BSSVS-BF values are  
328 represented on the top of the black arrows, while the root state posterior probability for the host-  
329 species transition are given on its bottom.

330

### 331 **Serotype SAT1**

332 The phylogeographic patterns of SAT1 exposed Uganda as its most likely country of origin  
333 (RSPP= 0.45), from where it spread to Namibia, Nigeria, and Chad (Fig. 8). The phylogenetic  
334 relationships identified three main clusters, one of them represented by the ancestor of the  
335 lineages found in Uganda and Chad, other by the lineages located in the countries that are part  
336 of the southern area of spread (i.e., Botswana, Mozambique, Namibia, South Africa and  
337 Tanzania), and the last cluster represented by the lineages found in Nigeria, which also  
338 presented the sub-lineage with the most recent appearance. Contrary to the previous serotypes,  
339 SAT1 did not present a clear source (country) of dispersal events, although its spread was  
340 mostly concentrated on Eastern Africa (Fig. 9A). Our results showed that the highest proportion  
341 of its dispersal events occurred across long distance countries (representing 63% of the cases,  
342 See Supplementary Video S4 for detailed footage). The most significant dispersal routes were  
343 strongly related to Uganda, which in order of intensity, were seen to happen from Uganda to  
344 Nigeria (BF= 35.2), which seemed the most significant, followed by the transition from Kenya to  
345 Tanzania (BF= 26.5) (Fig. 9B).

346 The host species associated with the dispersal of this serotype were *Bos taurus* and  
347 *Syncerus caffer* (Fig. 8). *B. taurus*, with the majority of the number of sequences (58.3%), is  
348 mostly distributed in the north and central Africa, while *S. caffer* (41.7%, appeared as the most  
349 common host species in the southern countries (i.e., Namibia, Botswana, and South Africa).  
350 Phylogenetic analysis suggested *B. taurus* as the most important host species for the origin of  
351 this serotype (RSPP= 0.98). Strongly supported transmission routes were inferred from *B.*

352 *taurus* to *S. caffer* (BF= 1233.3). However, the reverse transmission was not significant (BF<3)  
353 (Fig. 8).

354 Intriguingly, SAT1 BSP showed the most variable lineage diversity between all SATs,  
355 with an early increased in 1860 that was maintained until 1970, where this diversity increased  
356 again, reaching the values observed today (Fig. S2).

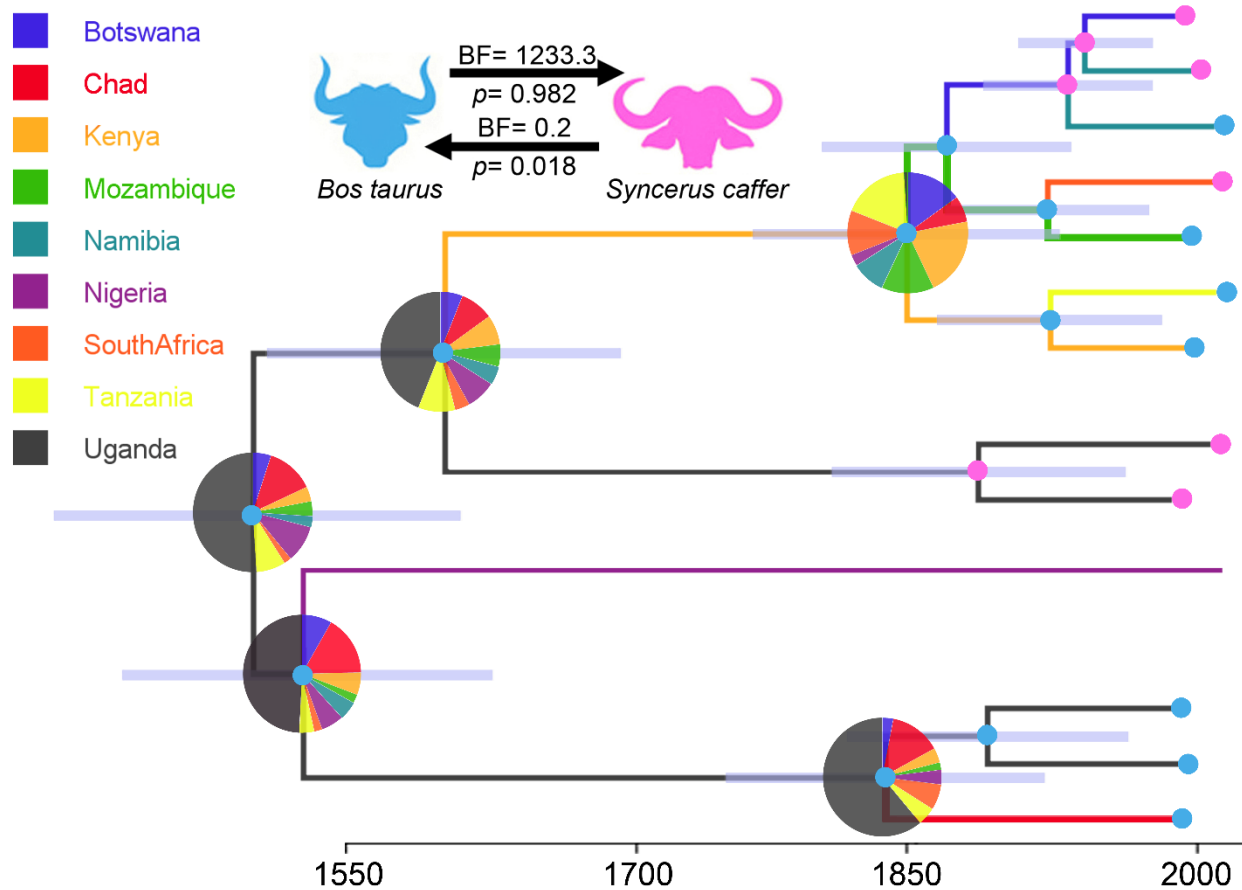

365 values) are represented on the top of the black arrows, while the root state posterior probability  
366 for the host-species transition are given on its bottom.

367

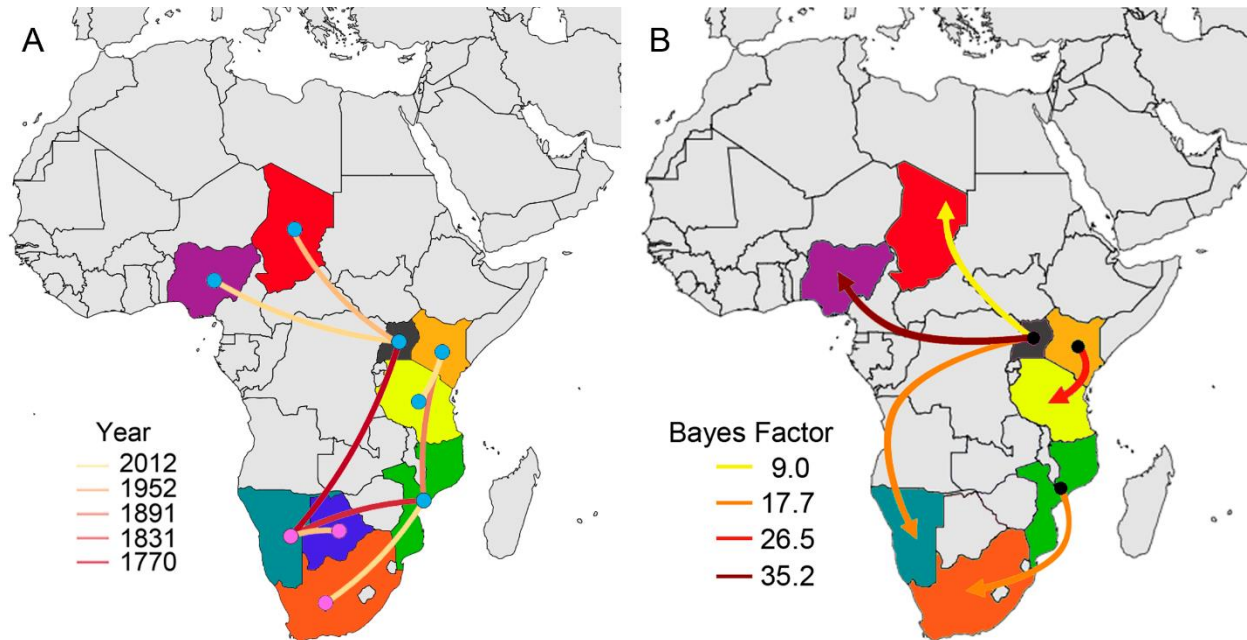

368

369 **Fig. 9** (A) Reconstructed spatiotemporal diffusion of FMDV serotype SAT1 spread, the color of  
370 the branches represents the age of the internal nodes, where darker red colors represent older  
371 spread events. (B) Representation of the most significant location transitions events for FMDV  
372 serotype SAT1 spread based on only the rates supported by a BF greater than 3 are indicated,  
373 where the color of the branches represent the relative strength by which the rates are  
374 supported.

375

### 376 Serotype SAT2

377 Phylogeographic analyses for SAT2 indicated Uganda as the most likely origin of the serotype  
378 (RSPP= 0.51), from which it spread to Botswana and The Gaza Strip later on time (Fig. 10).  
379 Later, from Botswana, this serotype expanded its distribution to Ethiopia, Zimbabwe, and  
380 Zambia, continuing spreading to surrounding countries also on the Eastern region of Africa (see  
381 Supplementary Video S5 for detailed footage). Phylogenetic analysis identified two main sub-

382 lineages, one found between Uganda and Gaza Strip and the second cluster formed by the  
383 lineages found in countries distributed in southeastern Africa (Fig. 10). Likewise, our results also  
384 evidenced that serotype SAT2 spread is mostly characterized by a higher proportion of long-  
385 distance movements (57%) over local dispersal events (Fig. 11A). Our phylodynamic model  
386 suggested that the strongest geographic transition routes occurred from Uganda to Gaza Strip  
387 (BF= 34.6), and from Botswana to Zambia (BF= 23.2) (Fig. 11B).

388 *B. taurus* and *S. caffer* were also the main host associated with SAT2 sequences, but in  
389 this case, *S. caffer* was the most representative (53.9%), over *B. taurus* (46.1%). However, *B.*  
390 *taurus* appeared in most of the reported locations (except in South Africa), while *S. caffer* was  
391 only described in Uganda, Botswana and South Africa. As observed in SAT1, phylogenetic  
392 analysis showed a higher influence of *B. taurus* as the host of the ancestral lineages of this  
393 serotype (RSPP= 0.63) (Fig. 10). Transmission dynamics between host species suggested that  
394 transmission from *B. taurus* to *S. caffer* was the most important (BF= 911.4), while transmission  
395 from *S. caffer* to *B. taurus* was not significant (BF<3) (Fig. 7D). Finally, BSP showed no variation  
396 in the lineage diversity found over time (Fig. S2).

397

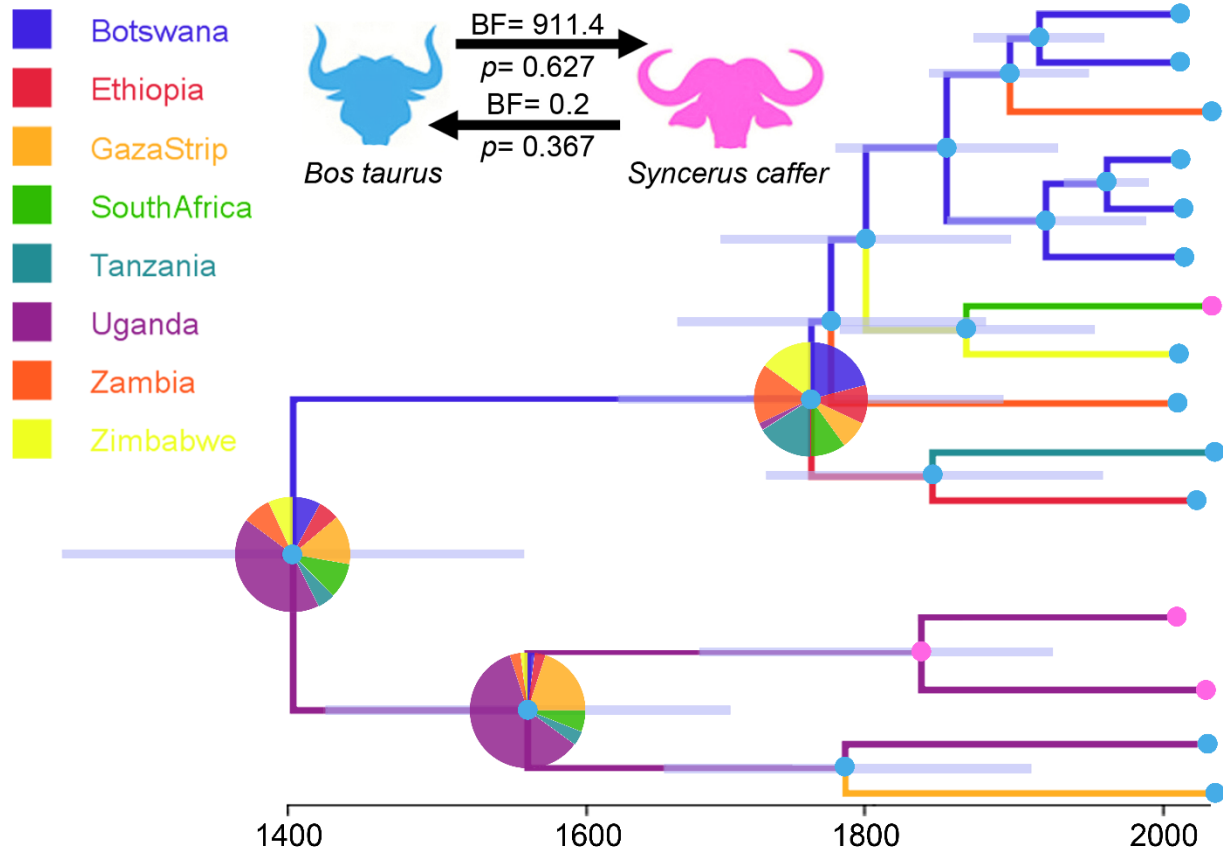

398

399 **Fig. 10** Dispersal history of FMDV lineages of Serotype SAT2, as inferred by discrete  
400 phylogeographic analysis. Maximum clade credibility phylogeny colored according to the  
401 countries of origin. Branch bars represent posterior probabilities of branching events ( $P > 0.95$ ).  
402 Colored dots at the end of the branches represent the host species (*Bos taurus*= cattle, and  
403 *Syncerus caffer*= African buffalo). The probabilities of ancestral states (inferred from the  
404 Bayesian discrete trait analysis) are shown in pie charts at each node, while circles on each  
405 branch and tips represent the most likely hosts. Transmission rates between hosts (BSSVS-BF  
406 values) are represented on the top of the black arrows, while the root state posterior probability  
407 for the host-species transition are given on its bottom.

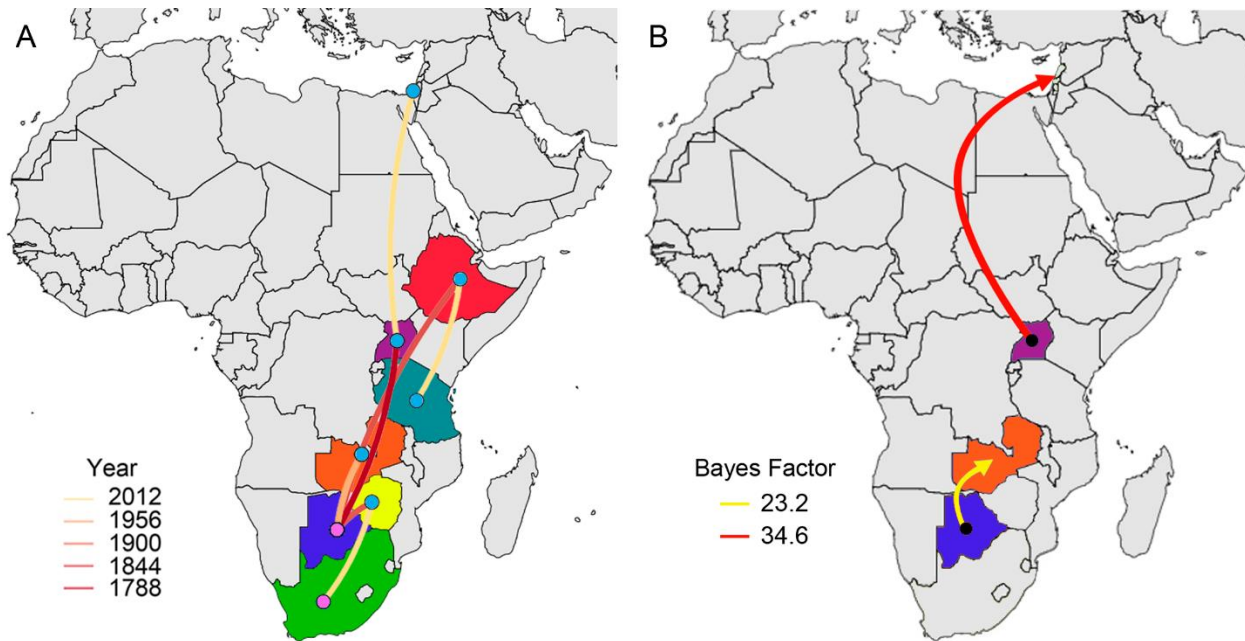

408

409 **Fig. 11** (A) Reconstructed spatiotemporal diffusion of FMDV serotype SAT2 spread, the color of  
410 the branches represents the age of the internal nodes, where darker red colors represent older  
411 spread events. (B) Representation of the most significant location transitions events for FMDV  
412 serotype SAT2 spread based on only the rates supported by a BF greater than 3 are indicated,  
413 where the color of the branches represent the relative strength by which the rates are  
414 supported.

415

### 416 **Serotype SAT3**

417 Similar to the previous SAT serotypes, SAT3 also had its ancestral origin in Uganda (RSPP=  
418 0.49), from where it traveled to Zimbabwe and then spread to its neighboring countries (Fig. 12,  
419 see Supplementary Video S6). Phylogenetic analyses identified two main sub-lineages, one of  
420 them found in Uganda and the second (and most diverse), present in the countries that are part  
421 of southern Africa (i.e., Botswana, South Africa, Zambia, and Zimbabwe). Phylogeographic  
422 reconstruction reflected the importance of Zimbabwe for the spread of this serotype, being this  
423 country the most common center of origin for the diffusion of the disease to Zambia, Botswana  
424 and most recently to South Africa. Contrary to all the other serotypes (except for Asia1),

425 spatiotemporal dynamics of serotype SAT3 showed that its spread has been dominated by local  
426 events (75%, Fig. 13A). Based on BSSVS-BF results, the most significant viral transmission  
427 routes for serotype SAT3 were represented by the dispersion from Zimbabwe to Botswana (BF=  
428 15.9) and from Zimbabwe to South Africa (BF= 12.1) (Fig. 13B).

429 *B. taurus* and *S. caffer* were also the main hosts reported for SAT3, appearing both in a  
430 similar proportion (*B. taurus*= 62.5%, and *S. caffer*= 37.5%). Similarly to all the serotypes above  
431 mentioned, cattle was the likely ancestral host species for this serotype (RSPP= 0.94).  
432 Furthermore, we found that most significant transmission routes for its spread occurred from *B.*  
433 *taurus* to *S. caffer* (BF= 792.9), while the transmission in the opposite direction was not  
434 significant (Fig. 12).

435 Like in the case of SAT2, the BSP obtained for this serotype showed no variation in the  
436 lineage diversity over time (Fig. S2).

437



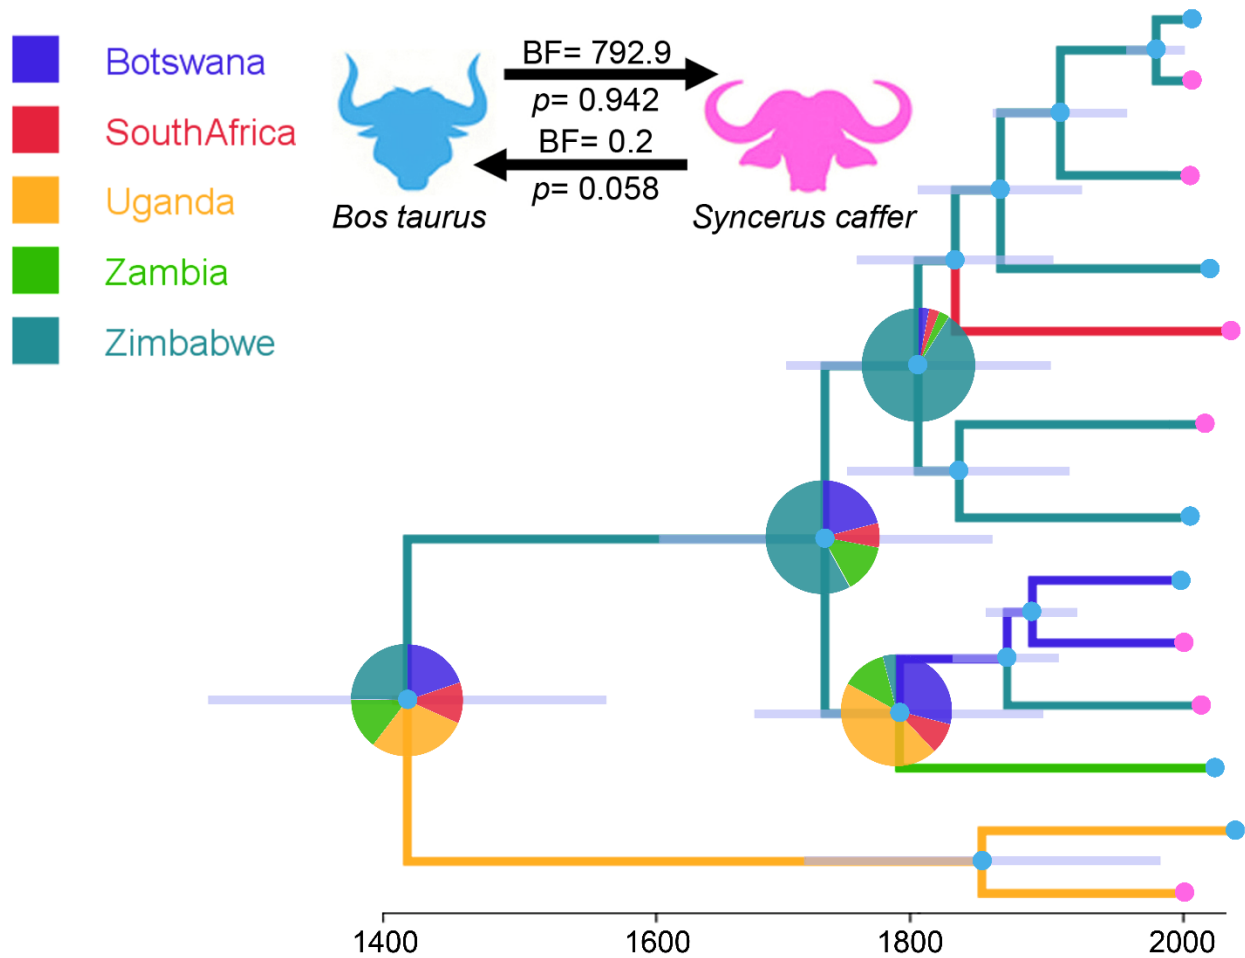

438

439 **Fig. 12** Dispersal history of FMDV lineages of Serotype SAT3, as inferred by discrete  
440 phylogeographic analysis. Maximum clade credibility phylogeny colored according to the  
441 countries of origin. Branch bars represent posterior probabilities of branching events ( $P > 0.95$ ).  
442 Colored dots at the end of the branches represent the host species (*Bos taurus*= cattle, and  
443 *Syncerus caffer*= African buffalo). The probabilities of ancestral states (inferred from the  
444 Bayesian discrete trait analysis) are shown in pie charts at each node, while circles on each  
445 branch and tips represent the most likely hosts. Transmission rates between hosts (BSSVS-BF  
446 values) are represented on the top of the black arrows, while the root state posterior probability  
447 for the host-species transition are given on its bottom.

448

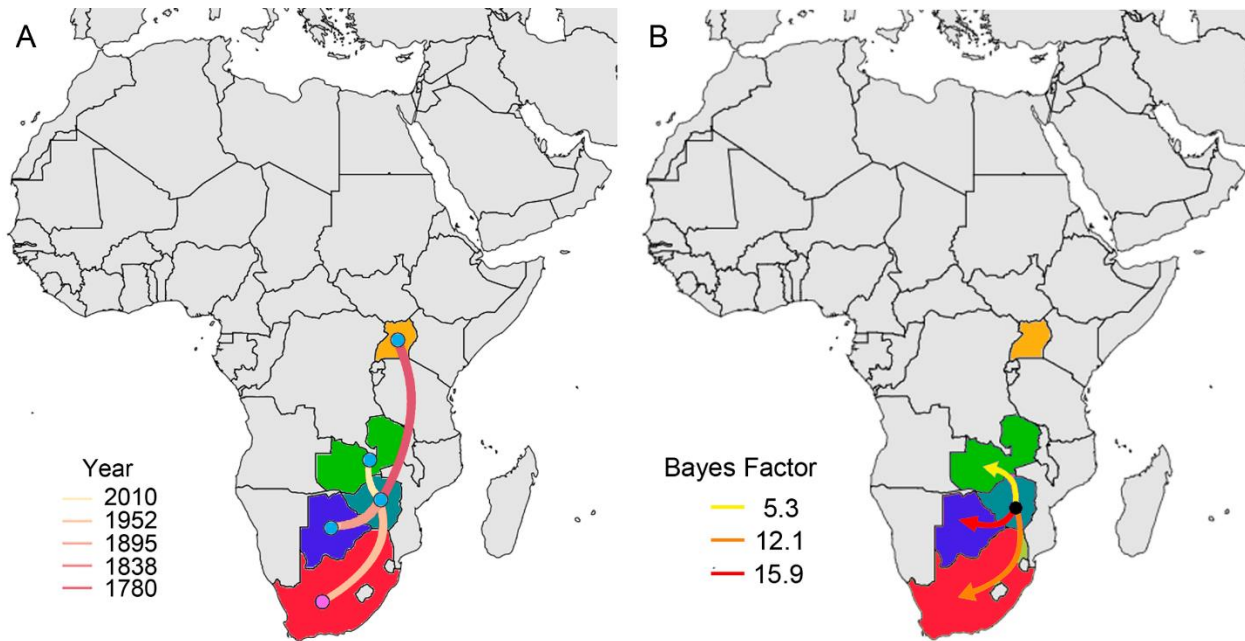

449

450 **Fig. 13** (A) Reconstructed spatiotemporal diffusion of FMDV serotype SAT3 spread, the color of  
451 the branches represents the age of the internal nodes, where darker red colors represent older  
452 spread events. (B) Representation of the most significant location transitions events for FMDV  
453 serotype SAT3 spread based on only the rates supported by a BF greater than 3 are indicated,  
454 where the color of the branches represent the relative strength by which the rates are  
455 supported.

456

## 457 **DISCUSSION**

458 This study revealed new insights about the evolutionary dynamics of the FMDV's global  
459 transmission dynamics at serotype level. The most likely country of origin for each serotype was  
460 identified, along with its historical spread characteristics, and divergence patterns across its  
461 historical dispersal. Finally, we assessed the impact of each host interaction in the spread of  
462 FMDV, providing a comprehensive characterization of transmission dynamics between host  
463 species.

464

465 **Phylogeographic patterns of FMDV spread**

466 Global patterns of FMDV spread were considerably asymmetric in its spatiotemporal  
467 arrangement, showing important variation among all serotypes, as previously observed by Yoon  
468 et al., (2011) and Brito et al., (2015). On the other hand, our results yielded discrepancies  
469 regarding the phylogenetic relationships of FMDV serotypes due to the disagreements observed  
470 in the cladistic characterization of FMDV serotypes (monophyletic or polyphyletic origin) [52].  
471 Lewis-Rogers et al. (2008) and Yoon et al. (2011) suggested that O, A, Asia1, C, and SAT3  
472 were monophyletic, while SAT1 and SAT2 serotypes were polyphyletic. However, our results  
473 indicated the presence of only three monophyletic serotypes (O, A, and Asia1), whilst all SAT  
474 serotypes appeared to have multiple ancestral origins which can be related to multiple points of  
475 independent introduction of the virus.

476

#### 477 *Serotypes with global distribution (O and A)*

478 Serotype O has shown a remarkable widespread distribution across the globe. In half of a  
479 century, this serotype reached almost all continents, causing dramatic economic losses [58, 77,  
480 78]. Root state posterior probability analysis inferred Belgium as the most likely center of origin  
481 for this serotype, which, as a result of being responsible for the majority of outbreaks worldwide  
482 [79], we can observe multiple centers of diversification in most of the continents. Our  
483 phylogeographic analysis showed that this spread has been characterized by lineage dispersal  
484 events between distant regions (i.e. to regions not sharing international dry borders with the  
485 origin country), instead of dispersal events between neighboring countries, which may be one of  
486 the keys for its successful global spread. Bayesian skyline plot showed a severe decline in the  
487 genetic diversity around early 21<sup>st</sup> century, this interesting pattern also observed by Yoon et al.,  
488 (2011). This decline and recover in the effective population size could be directly related to the  
489 increase in the FMDV outbreaks that occurred worldwide, which was followed by an intensive  
490 control and prevention strategies. The intense wave of outbreaks occurred during that period  
491 worldwide included countries such as, Argentina (Perez et al., 2004; Perez et al., 2004), the

492 United Kingdom [82, 83], Brazil [84], India [85], and Taiwan [86, 87]. As we observed in our  
493 phylogeographic visualization, there is strong evidence that most of these outbreaks were  
494 strongly interconnected [25, 88–90], evidencing local and long-distance spread of serotype.

495 One of the reasons for the success of the evolutionary diversification of this serotype  
496 may also be related to the diversity of hosts that it affects, which is the highest among all  
497 serotypes. Globally, *B. taurus* represented the most important host species for the spread of  
498 serotype O, while *S. scrofa* was mostly related to the spread of this serotype in southeastern  
499 Asia. Thus, phylodynamic analysis suggested that viral transition rate between these two  
500 livestock was the strongest reported between all the reported hosts.

501 Following the pandemic patterns showed by serotype O, the next large-scale potential of  
502 diffusion was exhibited by serotype A. Phylogeographic analysis suggested India as the most  
503 likely center of origin of the current circulating serotype A strains. Supporting previous studies  
504 [26, 60], we observed that India was also a key source of dispersal events for this serotype  
505 since most of the current strains are strongly related to India. Whole genome sequences of this  
506 serotype have been recorded in three continents, Asia, Africa, and South America, where it was  
507 reported as the causing agent of one of the biggest FMDV outbreaks, which occurred in  
508 Argentina in 2011, affecting a total of 2,126 herds [81]. It is important to note, that there is  
509 evidence of a posterior spread of these serotypes (O and A) to other countries, mainly in South  
510 America, since both of them are currently found in nearly every country of the continent [26, 79].  
511 However, due to the lack of whole-genome data, we were unable to further assess this spread.

512 As expected, the main host affected by serotype A was *B. taurus*. This species had an  
513 important role in its viral spread [56], especially in this globalized era, where the continuous  
514 increase in livestock trading markets facilitates the spread of transboundary animal diseases  
515 [91]. Likewise, our phylodynamic analysis showed that the most intense host species  
516 transmission route occurred from *B. taurus* to *S. caffer*, and apparently, the reverse  
517 transmission is an infrequent event.

518

519 *Asia1 and SAT serotypes*

520 Whereas our results showed that serotypes O and A have spread worldwide, serotypes Asia1  
521 and SATs remained non-pandemic and confined in their endemic regions [79, 92]. Since there  
522 is a lack of detailed sequences data available, especially for African countries, it is important to  
523 note that these results may vary with a better representation of the currently circulating virus,  
524 although they support what has been previously described [59, 79, 93, 94].

525         Undoubtedly, India has been historically considered as one of the most important  
526 countries for the spread and maintenance of FMDV, especially for serotypes A, and Asia1 [26,  
527 55, 79, 94] Indeed, our phylogeographic analyses showed India as the most likely origin country  
528 for Asia1 serotype [26, 94]. The spread of this serotype was mainly restricted to Asia [53, 55,  
529 93], and characterized by local movements across the neighboring countries surrounding India,  
530 China and Malaysia, where it is well known that free and unrestricted animal movements across  
531 country borders may play a key role in the spread of FMDV [55, 95]. We also observed India as  
532 a key center of dispersal for this serotype, which coincides with previously reported results [55].  
533 The arrival of Asia1 into Turkey in 2013 represents one of the most recent and longer dispersal  
534 events reported for this serotype, which was directly related to an Indian sub-lineage of the virus  
535 [96]. Likewise, there have been sporadic incursions into other countries such as Greece in 1984  
536 and 2000 [93], Malaysia in 1999 [31] or Turkey in 2017 [55], whose outbreaks seemed to be  
537 caused also by independent sub-lineages from the rest of the outbreaks observed in these  
538 regions.

539         Despite a previous study described multiple potential origins for SAT serotypes, (i.e.,  
540 SAT1 in Zimbabwe and SAT2 in Kenya [48]), our root state posterior probability results  
541 suggested Uganda as the most likely origin for all of them. Likewise, our phylogeographic  
542 analysis also highlighted the importance of Uganda as a primary source of dispersal events to

543 different countries, where the most strongly significant routes were found from Uganda to  
544 Nigeria (SAT1), from Uganda to Gaza strip (SAT2) and from Zimbabwe to Botswana (SAT3).

545 SAT serotypes (SAT1, SAT2, and SAT3) are characterized by a higher proportion of  
546 local spread, limited across their endemic areas. This spread occurred mainly in southeastern  
547 Africa, where nomadic pastoralism across international borders and animal trade in the sub-  
548 Saharan region is one of the most practiced forms of livestock movements [48, 56, 93, 94].  
549 These results complement the observations made by Bouslikhane (2015), who highlighted how  
550 nomadism and transhumance play a key role in disease transmission, especially in African  
551 countries.

552 Previous studies have highlighted the importance of African buffalo (*Syncerus caffer*),  
553 hypothesizing that current FMDV genotypes may emerge in domesticated host species from  
554 viral reservoirs maintained by this species [49, 53, 59, 94, 98–104] However, the uncertainty  
555 over the involvement of African buffalo arose the need for deeper research to confirm its  
556 influence in livestock outbreaks [94]. Our results coincide with the evidence mentioned in a  
557 recent study by Omondi et al (2019), where cattle appeared as the most important host species  
558 for the spread of FMDV, while buffalo played a secondary role. This pattern was observed not  
559 only in SATs but in all serotypes studied.

560 In general, we observed considerable differences in the spatiotemporal dynamics  
561 exhibited by the different serotypes. Where the serotypes with global distribution (O and A)  
562 presented the most asymmetrical pattern in the annual genetic diversity in comparison with  
563 (SAT and Asia1 serotypes). Cattle was observed to play a key role in the historical spread of all  
564 serotypes of FMDV. Likewise, our phylodynamic analysis inferred that the transmission route  
565 from cattle to buffalo was the most highly supported, pattern that was also observed for all  
566 serotypes, independently of its spread potential.

567 Serotypes such as Asia1 and SATs presented local spread rates, mainly associated  
568 with cattle and sheep (with special importance of buffalo in the case of SATs serotypes)

569 supporting previously described results (Brito et al., 2015; Omondi et al., 2019), while serotypes  
570 O and A showed long-distance spread, covering higher extensions of territory between each  
571 outbreak, which also confirms previously described information [59]. These serotypes presented  
572 the highest variety of susceptible hosts, although we speculate that the main reason for their  
573 successful long-distance spread relies mostly on the international movement of cattle and swine  
574 due to the intensive commerce between countries.

575         Finally, important limitations related to the use of whole genome relay in the lack of good  
576 global data, especially in African countries which remains endemically affected by five different  
577 serotypes, therefore some countries with known FMDV circulation are not part of this study.  
578 However, to reduce the bias generated by the strong unbalance of the available data in both  
579 dimensions (i.e., number of samples per country and uneven number of samples per host  
580 species), we removed all the sequences that where duplicated (i.e., represented the same  
581 outbreak multiple times), which, in the case of big outbreaks such as United Kingdom  
582 2001/2007, Argentina 2001, and Japan 2010, accounted for hundreds of sequences  
583 representing each event. This limitation is common among phylogenic studies with no yet best  
584 alternative, this is true mainly because sample that are available hosted in public databases or  
585 from diagnostic laboratories [105]. Although whole genome sequences are increasingly proving  
586 to be a more accurate tool for phylogenetic analyses [106, 107], its high cost in comparison to  
587 studies considering partial genome results in lower availability of WGS, which became the major  
588 limitation for the construction of our dataset, resulting several countries with known reports of  
589 FMDV but lacking genetic data. Finally, it is important to highlight that, despite the nucleotide  
590 sequences encoding the capsid protein VP1, VP2, and VP3 are sufficient to identify FMDV at  
591 serotype level, we preferred using WGS because of its higher accuracy in the determination of  
592 the genetic relationship between the reported cases [108].

593

594 **Final remarks**

595 Studies considering whole genome sequences should be preferred over partial sequence  
596 research to ensure the importance of considering virus spread in its overall context  
597 [53, 106, 107]. Besides, the growing awareness of the importance of using whole genome  
598 sequences to assess the evolution of infectious diseases, and more specifically for RNA viruses  
599 as FMDV plays a key role on the future ability to analyze the ever-increasing volume of data  
600 accurately, getting closer to a real-time assessing of disease outbreaks [106]. However, the use  
601 of whole genome sequences represented a limitation in our study since the lack of FMDV  
602 sequences in a given country does not mean that the virus has not been circulating in that  
603 country but maybe associated with technical or economic constraints, therefore interpretation  
604 requires caution due to the possible introduction of sampling bias. The popularization of whole  
605 genome sequencing will help not only to increase the available information about the virus, but  
606 also have a direct impact on promoting new and more specific measures for disease control [24,  
607 59, 109]. The result of such improvement in disease surveillance would not only be beneficial for  
608 the targeted region, but also for all the areas that are directly connected (i.e., through  
609 geographical limits) and indirectly (i.e., through commercial networks), including countries  
610 currently considered as free zones [110].

611

## 612 **CONCLUSION**

613 In summary, we have seen how FMDV evolved and diversified in five species among 64  
614 countries, by using a comprehensive phylodynamic approach, we characterized and compared  
615 its global phylogeographic distribution at serotype scale. The phylogeographic approach used  
616 here relies on the principle that evolutionary processes are better understood when a broader  
617 spatiotemporal vision is available. Our results shed light on FMDV's macroevolutionary patterns  
618 and spread, allowing to unravel the ancestral country of origin for each serotype as well as the  
619 most important historical routes of viral dispersal, the role that the main host species played in  
620 its spatial diffusion and how likely the disease is transmitted between them. The use of whole



621 genome sequences allowed us to clarify past discrepancies related to the polyphyletic nature of  
622 some serotypes (i.e., SATs), previously described as monophyletic.

623         Based on our findings, we corroborate with recent advancements that have been  
624 undertaken to control global distribution of major arbovirus (i.e., Dengue, yellow fever and Zika)  
625 [111–113], with the need to also implement real-time genome-scale sequencing to food-animal  
626 epidemics, in which metagenomics and phylogeography approaches inform epidemic responses  
627 and improve control intervention strategies.

628

## 629 **ACKNOWLEDGEMENTS**

630 We acknowledge the Department of Population Health and Pathobiology- North Carolina State  
631 University provided startup funds for G. Machado and M. Jara. SD is supported by the Fonds  
632 National de la Recherche Scientifique (FNRS, Belgium). Guy Baele acknowledges support from  
633 the Interne Fondsen KU Leuven / Internal Funds KU Leuven under grant agreement  
634 C14/18/094.

635

## 636 **CONFLICT OF INTEREST**

637 The authors declare that there are no conflict of interests.

638

## 639 **REFERENCES**

- 640 1. Burrell A. Animal Disease Epidemics: Implications for Production, Policy and Trade. Outlook  
641 Agric. 2002;31:151–60. doi:10.5367/000000002101294001.
- 642 2. Otte MJ, Nugent R, McLeod A. Transboundary animal diseases: Assessment of socio-  
643 economic impacts and institutional responses. In: Food and Agriculture Organization (FAO).  
644 2004. p. 119–26.
- 645 3. Daszak P, Cunningham AA, Hyatt AD. Anthropogenic environmental change and the  
646 emergence of infectious diseases in wildlife. Acta Trop. 2001;78:103–16.

- 647 <https://www.sciencedirect.com/science/article/pii/S0001706X00001790>. Accessed 12 Oct 2018.
- 648 4. Kouba V. Globalization of Communicable Animal Diseases - A Crisis of Veterinary Medicine.
- 649 *Acta Vet Brno*. 2003;72:453–60. doi:10.2754/avb200372030453.
- 650 5. Smith KF, Sax DF, Gaines SD, Guernier V, Guégan JF. Globalization of human infectious
- 651 disease. *Ecology*. 2007;88:1903–10. doi:10.1890/06-1052.1.
- 652 6. Kilpatrick AM. Globalization, land use, and the invasion of West Nile virus. *Science*.
- 653 2011;334:323–7. doi:10.1126/science.1201010.
- 654 7. Wang T, Sun Y, Qiu H-J. African swine fever: an unprecedented disaster and challenge to
- 655 China. *Infect Dis poverty*. 2018;7:111. doi:10.1186/s40249-018-0495-3.
- 656 8. Stearns SC, Ebert D. Evolution in Health and Disease: Work in Progress. *Q Rev Biol*.
- 657 2001;76:417–32. doi:10.1086/420539.
- 658 9. Read AF, Aaby P, Antia R, Ebert D, Ewald PW, Gupta S, et al. What can evolutionary biology
- 659 contribute to understanding virulence? In: *Evolution in Health and Disease*. 1999. p. 205–16.
- 660 [http://www.evolution.unibas.ch/ebert/publications/papers/03\\_book\\_chapters/1999\\_Read\\_in\\_StearnsBOOK.PDF](http://www.evolution.unibas.ch/ebert/publications/papers/03_book_chapters/1999_Read_in_StearnsBOOK.PDF). Accessed 15 Jan 2019.
- 661
- 662 10. Trevathan W. Evolutionary medicine. In: *The International Encyclopedia of Biological*
- 663 *Anthropology*. Hoboken, NJ, USA: John Wiley & Sons, Inc.; 1999. p. 1–4.
- 664 doi:10.1002/9781118584538.ieba0534.
- 665 11. Galvani AP. Epidemiology meets evolutionary ecology. *Trends in Ecology and Evolution*.
- 666 2003;18:132–9. doi:10.1016/S0169-5347(02)00050-2.
- 667 12. Mideo N, Alizon S, Day T. Linking within- and between-host dynamics in the evolutionary
- 668 epidemiology of infectious diseases. *Trends in Ecology and Evolution*. 2008;23:511–7.
- 669 doi:10.1016/j.tree.2008.05.009.
- 670 13. Lion S, Gandon S. Spatial evolutionary epidemiology of spreading epidemics. *Proc R Soc B*
- 671 *Biol Sci*. 2016;283. doi:10.1098/rspb.2016.1170.
- 672 14. Magiorkinis G, Magiorkinis E, Paraskevis D, Ho SYW, Shapiro B, Pybus OG, et al. The

- 673 global spread of hepatitis C virus 1a and 1b: A phylodynamic and phylogeographic analysis.  
674 PLoS Med. 2009;6:e1000198. doi:10.1371/journal.pmed.1000198.
- 675 15. Weaver SC, Forrester NL. Chikungunya: Evolutionary history and recent epidemic spread.  
676 Antiviral Res. 2015;120:32–9. doi:10.1016/j.antiviral.2015.04.016.
- 677 16. Dellicour S, Lemey P, Rose R, Faria NR, Pybus OG, Vieira LFP, et al. Using Viral Gene  
678 Sequences to Compare and Explain the Heterogeneous Spatial Dynamics of Virus Epidemics.  
679 Mol Biol Evol. 2017;34:2563–71. [https://academic.oup.com/mbe/article-](https://academic.oup.com/mbe/article-abstract/34/10/2563/3885213)  
680 [abstract/34/10/2563/3885213](https://academic.oup.com/mbe/article-abstract/34/10/2563/3885213). Accessed 15 Jan 2019.
- 681 17. Forni D, Cagliani R, Clerici M, Sironi M. Origin and dispersal of Hepatitis e virus article.  
682 Emerg Microbes Infect. 2018;7. doi:10.1038/s41426-017-0009-6.
- 683 18. Stephens PR, Altizer S, Smith KF, Alonso Aguirre A, Brown JH, Budischak SA, et al. The  
684 macroecology of infectious diseases: a new perspective on global-scale drivers of pathogen  
685 distributions and impacts. Ecol Lett. 2016;19:1159–71. doi:10.1111/ele.12644.
- 686 19. Jacquot M, Nomikou K, Palmarini M, Mertens P, Biek R. Bluetongue virus spread in Europe  
687 is a consequence of climatic, landscape and vertebrate host factors as revealed by  
688 phylogeographic inference. Proc R Soc B Biol Sci. 2017;284. doi:10.1098/rspb.2017.0919.
- 689 20. Lemey P, Pybus OG, Holmes EC, Grubaugh ND, Ladner JT, Rambaut A, et al. Tracking  
690 virus outbreaks in the twenty-first century. Nat Microbiol. 2018;4:10–9. doi:10.1038/s41564-018-  
691 0296-2.
- 692 21. Auguste AJ, Liria J, Forrester NL, Giambalvo D, Moncada M, Long KC, et al. Evolutionary  
693 and ecological characterization of mayaro virus strains isolated during an outbreak, Venezuela,  
694 2010. Emerg Infect Dis. 2015;21:1742–50. doi:10.3201/eid2110.141660.
- 695 22. Pigeault R, Vézilier J, Cornet S, Zélé F, Nicot A, Perret P, et al. Avian malaria: A new lease  
696 of life for an old experimental model to study the evolutionary ecology of Plasmodium. Philos  
697 Trans R Soc B Biol Sci. 2015;370. doi:10.1098/rstb.2014.0300.
- 698 23. Rogalski MA, Gowler CD, Shaw CL, Hufbauer RA, Duffy MA. Human drivers of ecological

- 699 and evolutionary dynamics in emerging and disappearing infectious disease systems.  
700 Philosophical Transactions of the Royal Society B: Biological Sciences. 2017;372.  
701 doi:10.1098/rstb.2016.0043.
- 702 24. Fountain-Jones NM, Pearse WD, Escobar LE, Alba-Casals A, Carver S, Davies TJ, et al.  
703 Towards an eco-phylogenetic framework for infectious disease ecology. *Biol Rev.* 2018;93:950–  
704 70. doi:10.1111/brv.12380.
- 705 25. Grubman MJ, Baxt B. Foot-and-mouth Disease. *Clin Microbiol Rev.* 2004;17:465–93.  
706 <http://cmr.asm.org/content/17/2/465.short>. Accessed 12 Oct 2018.
- 707 26. Brito B, Perez AM, Mohapatra J, Subramaniam S, Pattnaik B, Rodriguez LL, et al. Dynamics  
708 of widespread foot-and-mouth disease virus serotypes A, O and Asia-1 in southern Asia: A  
709 Bayesian phylogenetic perspective. *Transbound Emerg Dis.* 2017;65:696–710.  
710 <https://onlinelibrary.wiley.com/doi/abs/10.1111/tbed.12791>. Accessed 14 Apr 2019.
- 711 27. Belsham G. Distinctive features of foot-and-mouth disease virus, a member of the  
712 picornavirus family; aspects of virus protein synthesis, protein processing and structure. *Prog*  
713 *Biophys Mol Biol.* 1993;60:241–60.  
714 <https://www.sciencedirect.com/science/article/pii/007961079390016D>. Accessed 15 Jan 2019.
- 715 28. Sobrino F, Sáiz M, Jiménez-Clavero MA, Núñez JI, Rosas MF, Baranowski E, et al. Foot-  
716 and-mouth disease virus: A long known virus, but a current threat. *Veterinary Research.*  
717 2001;32:1–30. doi:10.1051/vetres:2001106.
- 718 29. Brown F. The history of research in foot-and-mouth disease. *Virus Res.* 2003;91:3–7.  
719 <https://www.sciencedirect.com/science/article/pii/S016817020200268X>. Accessed 3 Oct 2018.
- 720 30. OIE TM. Foot-And-Mouth Disease. 2009. doi:10.1146/annurev.mi.22.100168.001221.
- 721 31. Abdul-Hamid NF, Hussein NM, Wadsworth J, Radford AD, Knowles NJ, King DP.  
722 Phylogeography of foot-and-mouth disease virus types O and A in Malaysia and surrounding  
723 countries. *Infect Genet Evol.* 2011;11:320–8. doi:10.1016/j.meegid.2010.11.003.
- 724 32. Kandeil A, El-Shesheny R, Kayali G, Moatasim Y, Bagato O, Darwish M, et al.

- 725 Characterization of the recent outbreak of foot-and-mouth disease virus serotype SAT2 in  
726 Egypt. *Arch Virol.* 2013;158:619–27. doi:10.1007/s00705-012-1529-y.
- 727 33. Ganji V, Kontham S, Pottabathula M. Understanding the Molecular Relationship between  
728 Foot-and-Mouth Disease Virus Serotype O of Indian Vaccine Strain with Strains across the  
729 World by. *Phylogenetic Anal Int J Curr Microbiol.* 2018;7:99–105. [https://www.ijcmas.com/7-5-](https://www.ijcmas.com/7-5-2018/Vishweshwar%20Kumar%20Ganji,%20et%20al.pdf)  
730 [2018/Vishweshwar Kumar Ganji, et al.pdf](https://www.ijcmas.com/7-5-2018/Vishweshwar%20Kumar%20Ganji,%20et%20al.pdf). Accessed 18 Oct 2018.
- 731 34. Knight-Jones T, Rushton J. The economic impacts of foot and mouth disease - What are  
732 they, how big are they and where do they occur? *Preventive Veterinary Medicine.*  
733 2013;112:162–73. doi:10.1016/j.prevetmed.2013.07.013.
- 734 35. Alvarez J, Goede D, Morrison R, Perez A. Spatial and temporal epidemiology of porcine  
735 epidemic diarrhea (PED) in the Midwest and Southeast regions of the United States. *Prev Vet*  
736 *Med.* 2016;123:155–60. doi:10.1016/j.prevetmed.2015.11.003.
- 737 36. Rushton J, Knight-Jones TJD. The impact of foot and mouth disease. In: *FAO/OIE, Global*  
738 *Conference on Foot and Mouth Disease Control.* Food and Agriculture Organization of the  
739 United Nations and the World Organisation for Animal Health; 2015. p. 205–9.  
740 doi:10.1111/j.1746-692X.2004.tb00031.x.
- 741 37. USDA-APHIS. Planning and preparing for Foot-and-mouth disease: quick briefing. 2017.  
742 [https://www.aphis.usda.gov/animal\\_health/emergency\\_management/downloads/fmd-](https://www.aphis.usda.gov/animal_health/emergency_management/downloads/fmd-briefing.pdf)  
743 [briefing.pdf](https://www.aphis.usda.gov/animal_health/emergency_management/downloads/fmd-briefing.pdf).
- 744 38. Alexandersen S, Zhang Z, Donaldson AI, Garland AJM. The pathogenesis and diagnosis of  
745 foot-and-mouth disease. *Journal of Comparative Pathology.* 2003;129:1–36.  
746 doi:10.1016/S0021-9975(03)00041-0.
- 747 39. IUCN/SSC ISSG. *Global Invasive Species Database version 2013-1.* 2018.  
748 <http://www.issg.org/database/welcome/>. Accessed 14 Oct 2018.
- 749 40. Thomson GR, Bastos A. Foot-and-mouth disease. In: *Infectious Diseases of Livestock.*  
750 Cape Town: Oxford University Press; 2004. p. 1324–65.

- 751 41. Orsel K, Bouma A, Dekker A, Stegeman JA, de Jong MCM. Foot and mouth disease virus  
752 transmission during the incubation period of the disease in piglets, lambs, calves, and dairy  
753 cows. *Prev Vet Med.* 2009;88:158–63. doi:10.1016/j.prevetmed.2008.09.001.
- 754 42. Ferguson NM, Donnelly CA, Anderson RM. Transmission intensity and impact of control  
755 policies on the foot and mouth epidemic in Great Britain. *Nature.* 2001;413:542–8.  
756 <https://www.nature.com/articles/35097116>. Accessed 15 Jan 2019.
- 757 43. Fares M a, Tully DC. The tale of a modern animal plague: tracing the evolutionary history  
758 and determining the time-scale for foot and mouth disease virus. *Virology.* 2008;382:250–6.  
759 doi:10.1016/j.virol.2008.09.011.
- 760 44. Schumann KR, Knowles NJ, Davies PR, Midgley RJ, Valarcher J-F, Raoufi AQ, et al.  
761 Genetic characterization and molecular epidemiology of foot-and-mouth disease viruses  
762 isolated from Afghanistan in 2003–2005. *Virus Genes.* 2008;36:401–13. doi:10.1007/s11262-  
763 008-0206-4.
- 764 45. Priyadarshini P, Mohapatra JK, Hemadri D, Subramaniam S, Pattnaik B, Pandey L, et al.  
765 Analysis of the leader proteinase (Lpro) region of type A foot-and-mouth disease virus with due  
766 emphasis on phylogeny and evolution of the emerging VP359-deletion lineage from India. *Virus*  
767 *Res.* 2009;141:34–46. doi:10.1016/j.virusres.2008.12.012.
- 768 46. Lewis-Rogers N, McClellan DA, Crandall KA. The evolution of foot-and-mouth disease virus:  
769 Impacts of recombination and selection. *Infect Genet Evol.* 2008;8:786–98.  
770 doi:10.1016/j.meegid.2008.07.009.
- 771 47. Lycett SJ, Tanya VN, Hall M, King D, Mazeri S, Mioulet V, et al. The evolution and  
772 phylodynamics of serotype A and SAT2 foot-and-mouth disease viruses in endemic regions of  
773 Africa. *Sci Rep.* 2019;9:5614. doi:10.1101/572198.
- 774 48. Omondi G, Alkhamis MA, Obanda V, Gakuya F, Sangula A, Pauszek S, et al.  
775 Phylogeographical and cross-species transmission dynamics of SAT1 and SAT2 foot-and-  
776 mouth disease virus in Eastern Africa. *Mol Ecol.* 2019;:mec.15125. doi:10.1111/mec.15125.

- 777 49. Hall MD, Knowles NJ, Wadsworth J, Rambaut A, Woolhouse MEJ. Reconstructing  
778 geographical movements and host species transitions of foot-and-mouth disease virus serotype  
779 SAT 2. *MBio*. 2013;4:e00591-13. doi:10.1128/mBio.00591-13.
- 780 50. Yoon SH, Park W, King DP, Kim H. Phylogenomics and molecular evolution of foot-and-  
781 mouth disease virus. *Mol Cells*. 2011;31:413–21. doi:10.1007/s10059-011-0249-6.
- 782 51. Carrillo C, Tulman ER, Delhon G, Lu Z, Carreno A, Vagnozzi A, et al. Comparative  
783 genomics of foot-and-mouth disease virus. *J Virol*. 2005;79:6487–504.  
784 doi:10.1128/JVI.79.10.6487-6504.2005.
- 785 52. Cooke JN, Westover KM. Serotype-specific differences in antigenic regions of foot-and-  
786 mouth disease virus (FMDV): A comprehensive statistical analysis. *Infect Genet Evol*.  
787 2008;8:855–63. doi:10.1016/j.meegid.2008.08.004.
- 788 53. Lasecka-Dykes L, Wright CF, Di Nardo A, Logan G, Mioulet V, Jackson T, et al. Full  
789 genome sequencing reveals new southern african territories genotypes bringing us closer to  
790 understanding true variability of foot-and-mouth disease virus in Africa. *Viruses*. 2018;10.  
791 doi:10.3390/v10040192.
- 792 54. Baele G, Dellicour S, Suchard MA, Lemey P, Vrancken B. Recent advances in  
793 computational phylodynamics. *Curr Opin Virol*. 2018;31:24–32.  
794 doi:10.1016/J.COVIRO.2018.08.009.
- 795 55. Brito B, Pauszek SJ, Eschbaumer M, Stenfeldt C, De Carvalho Ferreira HC, Vu LT, et al.  
796 Phylodynamics of foot-and-mouth disease virus O/PanAsia in Vietnam 2010-2014. *Vet Res*.  
797 2017;48:24. doi:10.1186/s13567-017-0424-7.
- 798 56. Di Nardo. A, Knowles N, Paton D. Combining livestock trade patterns with phylogenetics to  
799 help understand the spread of foot and mouth disease in sub-Saharan Africa, the Middle East  
800 and. *Rev Sci Tech*. 2011;30:63.  
801 <http://www.unitheque.com/UploadFile/DocumentPDF/L/A/OMMT-9789290448372.pdf>.  
802 Accessed 15 Jan 2019.

- 803 57. De Carvalho LMF, Santos LBL, Faria NR, De Castro Silveira W. Phylogeography of foot-  
804 and-mouth disease virus serotype O in Ecuador. *Infect Genet Evol.* 2013;13:76–88.  
805 doi:10.1016/j.meegid.2012.08.016.
- 806 58. Bachanek-Bankowska K, Di Nardo A, Wadsworth J, Mioulet V, Pezzoni G, Grazioli S, et al.  
807 Reconstructing the evolutionary history of pandemic foot-and-mouth disease viruses: the impact  
808 of recombination within the emerging O/ME-SA/Ind-2001 lineage. *Sci Rep.* 2018;8:14693.  
809 doi:10.1038/s41598-018-32693-8.
- 810 59. Duchatel F, Bronsvort M, Lycett S. Phylogeographic analysis and identification of factors  
811 impacting the diffusion of Foot-and-Mouth disease virus in Africa. *Front Ecol Evol.* 2019;7:371.
- 812 60. Brito B, Pauszek SJ, Hartwig EJ, Smoliga GR, Vu LT, Dong P V., et al. A traditional  
813 evolutionary history of foot-and-mouth disease viruses in Southeast Asia challenged by  
814 analyses of non-structural protein coding sequences. *Sci Rep.* 2018;8. doi:10.1038/s41598-018-  
815 24870-6.
- 816 61. Kumar S, Nei M, Dudley J, Tamura K. MEGA: A biologist-centric software for evolutionary  
817 analysis of DNA and protein sequences. *Brief Bioinform.* 2008;9:299–306.  
818 doi:10.1093/bib/bbn017.
- 819 62. Martin DP, Murrell B, Golden M, Khoosal A, Muhire B. RDP4: Detection and analysis of  
820 recombination patterns in virus genomes. *Virus Evol.* 2015;1. doi:10.1093/ve/vev003.
- 821 63. Rambaut A, Lam T, Max Carvalho L, Pybus O. Exploring the temporal structure of  
822 heterochronous sequences using TempEst (formerly Path-O-Gen). *Virus Evol.* 2016;2:vev007.  
823 doi:10.1093/ve/vev007.
- 824 64. Murray GGR, Wang F, Harrison EM, Paterson GK, Mather AE, Harris SR, et al. The effect of  
825 genetic structure on molecular dating and tests for temporal signal. *Methods Ecol Evol.*  
826 2016;7:80–9. doi:10.1111/2041-210X.12466.
- 827 65. Navascués M, Depaulis F, Emerson B. Combining contemporary and ancient DNA in  
828 population genetic and phylogeographical studies. *Mol Ecol Resour.* 2010;10:760–72.



- 829 doi:10.1111/j.1755-0998.2010.02895.x.
- 830 66. Bouckaert R, Heled J, Kühnert D, Vaughan T, Wu CH, Xie D, et al. BEAST 2: A Software  
831 Platform for Bayesian Evolutionary Analysis. PLoS Comput Biol. 2014;10:e1003537.  
832 doi:10.1371/journal.pcbi.1003537.
- 833 67. Hasegawa M, Kishino H, Yano T. Dating of the human-ape splitting by a molecular clock of  
834 mitochondrial DNA. J Mol Evol. 1985;22:160–74. doi:10.1007/BF02101694.
- 835 68. Shapiro B, Rambaut A, Drummond AJ. Choosing appropriate substitution models for the  
836 phylogenetic analysis of protein-coding sequences. academic.oup.com. 2006;23:7–9.  
837 doi:10.1093/molbev/msj021.
- 838 69. Russel PM, Brewer BJ, Klaere S, Bouckaert RR. Model Selection and Parameter Inference  
839 in Phylogenetics Using Nested Sampling. Syst Biol. 2019;68:219–33.  
840 doi:10.1093/sysbio/syy050.
- 841 70. Drummond AJ, Ho SYW, Phillips MJ, Rambaut A. Relaxed phylogenetics and dating with  
842 confidence. PLoS Biol. 2006;4:e88. doi:10.1371/journal.pbio.0040088.
- 843 71. Drummond A, Rambaut A, Shapiro B, Pybus OG. Bayesian coalescent inference of past  
844 population dynamics from molecular sequences. Mol Biol Evol. 2005;22:1185–92.  
845 doi:10.1093/molbev/msi103.
- 846 72. Rambaut AR, Drummond ALJ, Dong X, Baele G, Suchard M. Posterior Summarization in  
847 Bayesian Phylogenetics Using Tracer 1 . 7. Syst Biol. 2018;67:901–4.  
848 doi:10.1093/sysbio/syy032.
- 849 73. Rambaut A. FigTree-version 1.4. 3, a graphical viewer of phylogenetic trees. 2017.
- 850 74. Lemey P, Rambaut A, Drummond AJ, Suchard MA. Bayesian Phylogeography Finds Its  
851 Roots. PLoS Comput Biol. 2009;5:e1000520. doi:10.1371/journal.pcbi.1000520.
- 852 75. Drummond AJ, Bouckaert RR. Bayesian evolutionary analysis with BEAST. Cambridge  
853 University Press; 2015.
- 854 76. Bielejec F, Baele G, Vrancken B, Suchard M, Rambaut A, Lemey P. SpreaD3: interactive

- 855 visualization of spatiotemporal history and trait evolutionary processes. *Mol Biol Evol.*  
856 2016;33:2167–9. <https://academic.oup.com/mbe/article-abstract/33/8/2167/2579258>. Accessed  
857 15 Jan 2019.
- 858 77. Hemadri D, Tosh C, Sanyal A, Venkataramanan R. Emergence of a new strain of type O  
859 Foot-and-mouth disease virus: Its phylogenetic and evolutionary relationship with the PanAsia  
860 pandemic strain. *Virus Genes.* 2002;25:23–34. doi:10.1023/A:1020165923805.
- 861 78. Knowles NJ, Samuel AR, Davies PR, Midgley RJ, Valarcher J-F. Pandemic strain of foot-  
862 and-mouth disease virus serotype O. *Emerg Infect Dis.* 2005;11:1887–93.  
863 doi:10.3201/eid1112.050908.
- 864 79. Rweyemamu M, Roeder P, Mackay D, Sumption K, Brownlie J, Leforban Y, et al.  
865 Epidemiological Patterns of Foot-and-Mouth Disease Worldwide. *Transbound Emerg Dis.*  
866 2008;55:57–72. doi:10.1111/j.1865-1682.2007.01013.x.
- 867 80. Perez AM, Ward MP, Carpenter TE. Control of a foot-and-mouth disease epidemic in  
868 Argentina. *Prev Vet Med.* 2004;65:217–26.
- 869 81. Perez AM, Ward MP, Carpenter TE. Epidemiological investigations of the 2001 foot-and-  
870 mouth disease outbreak in Argentina. *Vet Rec.* 2004;154:777–82.  
871 <https://veterinaryrecord.bmj.com/content/154/25/777.short>. Accessed 8 Mar 2019.
- 872 82. Thompson D, Muriel P, Russell D, Osborne P, Bromley A, Rowland M, et al. Economic costs  
873 of the foot and mouth disease outbreak in the United Kingdom in 2001. *Rev Sci Tech.*  
874 2002;21:675–87. <https://europepmc.org/abstract/med/12523706>. Accessed 15 Jan 2019.
- 875 83. Gloster J, Paton DJ, Hutchings GH, King DP, Ferris NP, Haydon DT, et al. Molecular  
876 Epidemiology of the Foot-and-Mouth Disease Virus Outbreak in the United Kingdom in 2001. *J*  
877 *Virology.* 2006;80:11274–82. doi:10.1128/jvi.01236-06.
- 878 84. Melo EC, Saraiva V, Studillo V. Review of the status of foot and mouth disease in countries  
879 of South America and approaches to control and eradication. *Rev Sci Tech Int des épizooties.*  
880 2002;21:429–33. doi:10.20506/rst.21.3.1350.

- 881 85. Huang CC, Lin YL, Huang TS, Tu WJ, Lee SH, Jong MH, et al. Molecular characterization of  
882 foot-and-mouth disease virus isolated from ruminants in Taiwan in 1999-2000. *Vet Microbiol.*  
883 2001;81:193–205. doi:10.1016/S0378-1135(01)00308-X.
- 884 86. Dunn CS, Donaldson AI. Natural adaption to pigs of a Taiwanese isolate of foot-and-mouth  
885 disease virus. *Vet Rec.* 1997;141:174–5. doi:10.1136/vr.141.7.174.
- 886 87. Yang PC, Chu RM, Chung WB, Sung HT. Epidemiological characteristics and financial costs  
887 of the 1997 foot-and-mouth disease epidemic in Taiwan. *Vet Rec.* 1999;145:731–4.  
888 <https://veterinaryrecord.bmj.com/content/145/25/731.short>. Accessed 12 Jul 2019.
- 889 88. Knowles NJ, Samuel AR, Davies PR, Kitching RP, Donaldson AI. Outbreak of foot-and-  
890 mouth disease virus serotype O in the UK caused by a pandemic strain. *Vet Rec.*  
891 2001;148:258–9. <http://www.ncbi.nlm.nih.gov/pubmed/11292084>. Accessed 12 Jul 2019.
- 892 89. Sangare O, Bastos AD, Marquardt O, Venter EH, Vosloo W, Thomson GR. Molecular  
893 epidemiology of serotype O foot-and-mouth disease virus with emphasis on West and South  
894 Africa. *Virus Genes.* 2001;22:345–51.  
895 <https://link.springer.com/article/10.1023/A:1011178626292>. Accessed 12 Jul 2019.
- 896 90. Pluimers FH, Akkerman AM, van der Wal P, Dekker A, Bianchi A. Lessons from the foot and  
897 mouth disease outbreak in The Netherlands in 2001. *Rev Sci Tech.* 2002;21:711–21.  
898 <https://pdfs.semanticscholar.org/ada9/a1b0ecd88ea85df19e53b462fd897bff4b11.pdf>. Accessed  
899 12 Jul 2019.
- 900 91. Cartín-Rojas A. Transboundary animal diseases and international trade. In: *International*  
901 *Trade from Economic and Policy Perspective.* 2012. p. 143–66.  
902 <https://books.google.com/books?hl=es&lr=&id=AO6dDwAAQBAJ&oi=fnd&pg=PA143&dq=Trans>  
903 [boundary+animal+diseases+and+international+trade&ots=EFgRQFP16\\_&sig=7zwIV71w7VMu](https://books.google.com/books?hl=es&lr=&id=AO6dDwAAQBAJ&oi=fnd&pg=PA143&dq=Trans)  
904 [N840ZcDs26yWhm0](https://books.google.com/books?hl=es&lr=&id=AO6dDwAAQBAJ&oi=fnd&pg=PA143&dq=Trans). Accessed 12 Jul 2019.
- 905 92. Kitching RP. Global Epidemiology and Prospects for Control of Foot-and-Mouth Disease. In:  
906 *Foot-and-Mouth-Disease Virus.* Heidelberg, Berlin: Springer-Verlag; 2005. p. 133–48.

- 907 [https://link.springer.com/content/pdf/10.1007/3-540-27109-0\\_6.pdf](https://link.springer.com/content/pdf/10.1007/3-540-27109-0_6.pdf). Accessed 12 Jul 2019.
- 908 93. Jamal SM, Belsham GJ. Foot-and-mouth disease: past, present and future. *Vet Res.*
- 909 2013;44:116. doi:10.1186/1297-9716-44-116.
- 910 94. Brito B, Rodriguez L, Hammond J, Pinto J, Perez A. Review of the Global Distribution of
- 911 Foot-and-Mouth Disease Virus from 2007 to 2014. *Transboundary and Emerging Diseases.*
- 912 2015;64:316–32. doi:10.1111/tbed.12373.
- 913 95. Subramaniam S, Pattnaik B, Sanyal A, Mohapatra JK, Pawar SS, Sharma GK, et al. Status
- 914 of Foot-and-mouth Disease in India. *Transbound Emerg Dis.* 2013;60:197–203.
- 915 doi:10.1111/j.1865-1682.2012.01332.x.
- 916 96. Upadhyaya S, Ayelet G, Paul G, King DP, Paton DJ, Mahapatra M. Genetic basis of
- 917 antigenic variation in foot-and-mouth disease serotype A viruses from the Middle East. *Vaccine.*
- 918 2014;32:631–8. doi:10.1016/j.vaccine.2013.08.102.
- 919 97. Bouslikhane M. Cross border movements of animals and animal products and their
- 920 relevance to the epidemiology of animals disease in Africa. OIE Africa Regional Commission.;
- 921 2015. <https://pdfs.semanticscholar.org/3502/9521c392e33c47c1d7c039f9a172fc132008.pdf>.
- 922 Accessed 21 Mar 2019.
- 923 98. Dion E, VanSchalkwyk L, Lambin EF. The landscape epidemiology of foot-and-mouth
- 924 disease in South Africa: A spatially explicit multi-agent simulation. *Ecol Modell.* 2011;222:2059–
- 925 72. doi:10.1016/j.ecolmodel.2011.03.026.
- 926 99. Vosloo W, Bastos AD, Kirkbride E, Esterhuysen JJ, van Rensburg DJ, Bengis RG, et al.
- 927 Persistent infection of African buffalo (*Syncerus caffer*) with SAT-type foot-and-mouth disease
- 928 viruses: rate of fixation of mutations, antigenic change and interspecies transmission. *J Gen*
- 929 *Virol.* 1996;77:1457–67. doi:10.1099/0022-1317-77-7-1457.
- 930 100. Thomson GR, Vosloo W, Bastos AD. Foot and mouth disease in wildlife. *Virus Res.*
- 931 2003;91:145–61. doi:10.1016/s0168-1702(02)00263-0.
- 932 101. Michel AL, Bengis RG. The African buffalo: A villain for inter-species spread of infectious

- 933 diseases in southern Africa. OpenJournals Publishing; 2012.
- 934 [http://www.scielo.org.za/scielo.php?script=sci\\_arttext&pid=S0030-24652012000200006](http://www.scielo.org.za/scielo.php?script=sci_arttext&pid=S0030-24652012000200006).
- 935 Accessed 5 Jul 2019.
- 936 102. Bronsvoot BMDC, Parida S, Handel I, McFarland S, Fleming L, Hamblin P, et al.
- 937 Serological survey for foot-and-mouth disease virus in wildlife in eastern Africa and estimation of
- 938 test parameters of a nonstructural protein enzyme-linked immunosorbent assay for buffalo. *Clin*
- 939 *Vaccine Immunol.* 2008;15:1003–11. doi:10.1128/CVI.00409-07.
- 940 103. Ayebazibwe C, Mwiine FN, Tjørnehøj K, Balinda SN, Muwanika VB, Ademun Okurut AR, et
- 941 al. The role of African buffalos (*syncerus caffer*) in the maintenance of foot-and-mouth disease
- 942 in Uganda. *BMC Vet Res.* 2010;6:54. doi:10.1186/1746-6148-6-54.
- 943 104. Dhikusooka MT, Tjørnehøj K, Ayebazibwe C, Namatovu A, Ruhweza S, Siegismund HR, et
- 944 al. Foot-and-mouth disease virus serotype SAT 3 in long-horned ankole Calf, Uganda. *Emerg*
- 945 *Infect Dis.* 2015;21:111–4. doi:10.3201/eid2101.140995.
- 946 105. Frost SDW, Pybus OG, Gog JR, Viboud C, Bonhoeffer S, Bedford T. Eight challenges in
- 947 phylodynamic inference. *Epidemics.* 2015;10:88–92. doi:10.1016/j.epidem.2014.09.001.
- 948 106. Dudas G, Bedford T. The ability of single genes vs full genomes to resolve time and space
- 949 in outbreak analysis. *BiorXiv.* 2019;:27. doi:10.1101/582957.
- 950 107. Gilchrist CA, Turner SD, Riley MF, Petri WA, Hewlett EL. Whole-genome sequencing in
- 951 outbreak analysis. *Clin Microbiol Rev.* 2015;28:541–63. doi:10.1128/CMR.00075-13.
- 952 108. Mason PW, Pacheco JM, Zhao QZ, Knowles NJ. Comparisons of the complete genomes
- 953 of Asian, African and European isolates of a recent foot-and-mouth disease virus type O
- 954 pandemic strain (PanAsia). *J Gen Virol.* 2003;84:1583–93. doi:10.1099/vir.0.18669-0.
- 955 109. Schrag SJ, Wiener P. Emerging infectious disease: what are the relative roles of ecology
- 956 and evolution. *Trends Ecol Evol.* 1995;10:319–24.
- 957 <https://www.sciencedirect.com/science/article/pii/S0169534700891181>. Accessed 17 Jan 2019.
- 958 110. King D, Di Nardo A, Henstock M. OIE/FAO Foot-and-Mouth Disease Reference Laboratory

959 Network: Annual report 2017. 2016;;91.

960 111. Thézé J, Li T, du Plessis L, Bouquet J, Kraemer MU, Somasekar S, et al. Genomic

961 Epidemiology Reconstructs the Introduction and Spread of Zika Virus in Central America and

962 Mexico. *Cell host Microbe*. 2018;23:1–10.

963 <https://www.sciencedirect.com/science/article/pii/S193131281830218X>. Accessed 12 Jul 2019.

964 112. Faria NR, Kraemer MU, Hill S, De Jesus JG, De Aguiar RS, Iani FC, et al. Genomic and

965 epidemiological monitoring of yellow fever virus transmission potential. *BiorXiv*. 2018.

966 113. Messina J, Brady O, Golding N, Kraemer MUG, Wint GRW, Ray SE, et al. The current and

967 future global distribution and population at risk of dengue. *Nat Microbiol*. 2019;in press.

968 <https://www.nature.com/articles/s41564-019-0476-8>. Accessed 12 Jul 2019.

969

## 970 **SUPPLEMENTARY MATERIAL**

971

972 **TABLE S1.** Sample information for all Foot and Mouth Disease virus complete genome

973 sequences used in this study.

974

975 **TABLE S2.** Root-to-tip regression analyses of phylogenetic temporal signal. Correlation and

976 determination coefficient ( $R^2$ ) were estimated with TempEst (Rambaut et al. 2016). P-values

977 were calculated using the approach of Murray et al. (2016) and were based on 1,000 random

978 permutations of the sequence sampling dates (Navascuès et al. 2010).

979

980 **TABLE S3.** Number of sequences and serotypes per country.

981

982 **Fig. S1** Spatial distribution of Foot-and-mouth disease virus showing the number of serotypes

983 per country.

984

985 **Fig. S2** Reconstructed Bayesian Coalescent Skyline plots (BSP) of FMDV serotypes. The  
986 median estimated of the effective population size through time are represented by the dark blue.  
987 The 95% highest posterior density confidence intervals are marked in blue.

988

989 **Video S1.** Reconstructed spatiotemporal diffusion of FMD serotype O spread, where diameters  
990 of the colored circles are proportional to the square root of the number of MCC branches,  
991 maintaining a particular location state at each time period. The color of the branches represents  
992 the age of the internal nodes, where darker red colors represent older spread events, this  
993 visualization match with the main time bar on top of the video.

994

995 **Video S2.** Reconstructed spatiotemporal diffusion of FMD serotype A spread, where diameters  
996 of the colored circles are proportional to the square root of the number of MCC branches,  
997 maintaining a particular location state at each time period. The color of the branches represents  
998 the age of the internal nodes, where darker red colors represent older spread events, this  
999 visualization match with the main time bar on top of the video.

1000

1001 **Video S3.** Reconstructed spatiotemporal diffusion of FMD serotype Asia1 spread, where  
1002 diameters of the colored circles are proportional to the square root of the number of MCC  
1003 branches, maintaining a particular location state at each time period. The color of the branches  
1004 represents the age of the internal nodes, where darker red colors represent older spread  
1005 events, this visualization match with the main time bar on top of the video.

1006

1007 **Video S4.** Reconstructed spatiotemporal diffusion of FMD serotype SAT1 spread, where  
1008 diameters of the colored circles are proportional to the square root of the number of MCC  
1009 branches, maintaining a particular location state at each time period. The color of the branches

1010 represents the age of the internal nodes, where darker red colors represent older spread  
1011 events, this visualization match with the main time bar on top of the video.

1012

1013 **Video S5.** Reconstructed spatiotemporal diffusion of FMD serotype SAT2 spread, where  
1014 diameters of the colored circles are proportional to the square root of the number of MCC  
1015 branches, maintaining a particular location state at each time period. The color of the branches  
1016 represents the age of the internal nodes, where darker red colors represent older spread  
1017 events, this visualization match with the main time bar on top of the video.

1018

1019 **Video S6.** Reconstructed spatiotemporal diffusion of FMD serotype SAT3 spread, where  
1020 diameters of the colored circles are proportional to the square root of the number of MCC  
1021 branches, maintaining a particular location state at each time period. The color of the branches  
1022 represents the age of the internal nodes, where darker red colors represent older spread  
1023 events, this visualization match with the main time bar on top of the video.
